# Rumen Sampling Methods Bias Bacterial Communities Observed

Jill V. Hagey<sup>1</sup>,

Maia Laabs<sup>1</sup>,

Elizabeth A. Maga<sup>1</sup>

Edward J. DePeters<sup>1\*</sup>

<sup>1</sup> Department of Animal Science, University of California Davis, California, USA

Running title: Biases of Rumen Sampling Methods

\*Correspondence:

Edward J. DePeters

[ejdepeters@ucdavis.edu](mailto:ejdepeters@ucdavis.edu)

## 30 **Abstract**

31 The rumen is a complex ecosystem that plays a critical role in our efforts to improve feed  
32 efficiency of cattle and reduce their environmental impacts. Sequencing of the 16S rRNA gene  
33 provides a powerful tool to survey shifts in the microbial community in response to feed  
34 additives and dietary changes. Oral stomach tubing a cow for a rumen sample is a rapid, cost-  
35 effective alternative to rumen cannulation for acquiring rumen samples. In this study, we  
36 determined how sampling method, as well as type of sample collected (liquid vs solid), bias the  
37 microbial populations observed. The abundance of major archaeal populations was not different  
38 at the family level in samples acquired via rumen cannula or stomach tube. Liquid samples were  
39 enriched for the order WCHB1-41 (phylum Kiritimatiellaota) as well as the family  
40 *Prevotellaceae* and had significantly lower abundance of *Lachnospiraceae* compared with grab  
41 samples from the rumen cannula. Solid samples most closely resembled the grab samples;  
42 therefore, inclusion of particulate matter is important for an accurate representation of the rumen  
43 microbes. Stomach tube samples were the most variable and were most representative of the  
44 liquid phase. In comparison with a grab sample, stomach tube samples had significantly lower  
45 abundance of *Lachnospiraceae*, *Fibrobacter* and *Treponema*. Fecal samples did not reflect the  
46 community composition of the rumen, as fecal samples had significantly higher relative  
47 abundance of *Ruminococcaceae* and significantly lower relative abundance of *Lachnospiraceae*  
48 compared with samples from the rumen.

## 49 **Introduction**

50 The ruminant stomach consists of four chambers the reticulum, rumen, omasum, and  
51 abomasum. The rumen, which is the largest of the four compartments, is a complex pregastric

52 anaerobic fermentation chamber that harbors a diverse microbial community of bacteria,  
53 archaea, protozoa, and fungi [1]. These microbes exist symbiotically inside the ruminant host and  
54 are responsible for fermentation of dietary compounds. During the anaerobic fermentation of  
55 chemical constituents in the diet, volatile fatty acids (VFA), B-vitamins, and microbial cell  
56 proteins are produced, which serve as sources of nutrients and energy for the host that have a  
57 direct effect on physiological and production parameters [2]. As the rumen compartment does  
58 not secrete enzymes, ruminants are dependent on the enzymes produced by the various rumen  
59 microbes for digestion of feed. These microbial enzymes allow the ruminant to convert a wide  
60 variety of both plant- and animal-based feedstuffs into products that will contribute to the  
61 synthesis of meat and milk for human consumption. The bacterial population of the rumen  
62 comprises nearly 95% of the total microbial community and is diverse. There are many genera of  
63 bacteria that have been linked to feed efficiency, milk yield, and milk composition in dairy cattle  
64 [3,4].

65 Factors such as age [5], breed [6–8], health status, season [9] and diet of the animal all  
66 contribute to variation in the microbiota of the rumen. Dietary composition was reported to be  
67 the primary factor affecting the taxa present in the rumen microbiota as well as the richness of  
68 those taxa, with the ratio of forage-to-concentrate in the diet of utmost importance [10–12]. The  
69 rumen is home to a stable yet dynamic microbial ecosystem that has adapted to survive in an  
70 anaerobic environment with osmotic pressure, high buffering capacity and internal competition  
71 for substrate [13]. When dietary changes occur slowly, rumen conditions change causing  
72 microbial populations to shift in response to the new feed ingredients by favoring the growth of  
73 certain taxa over others, which subsequently affects the organic acid profiles produced [14].  
74 However, when a dietary change occurs rapidly, for example changing from high forage diet

75 (high cellulose and hemicellulose substrate) to a high concentrate diet (high starch and sugar),  
76 the shift in microbial community often causes simple indigestion in the cow, which can lead to  
77 ketosis. This occurs in dairy production when cows transition from a high forage diet fed  
78 prepartum to a lower forage, higher concentrate lactation diet in a matter of hours, which can  
79 contribute to indigestion. Management strategies at the farm level have evolved to minimize  
80 perturbations to the rumen microbial environment that reduce health and production performance  
81 when ingredients in the diet change due to cost or availability of a feed ingredient. Methods to  
82 quickly sample and diagnose microbial perturbations due to dietary transitions could improve the  
83 management strategies of these high-risk animals.

84         The composition of the rumen microbiota was first described by Hungate in 1966, and  
85 has been studied more extensively in recent years, in part due to the reduced costs associated  
86 with next generation sequencing techniques such as the pyrosequencing and Illumina platforms  
87 [15]. Much of the recent interest in the rumen microbiota has been generated by research related  
88 to climate change and the potential to reduce methane emissions from ruminant livestock as a  
89 greenhouse gas mitigation strategy. Next generation sequencing has thus far been a successful  
90 tool for characterizing the diversity of the microbial community within the rumen in greater  
91 detail through 16S rRNA gene amplicon profiling [16,17]. This technology is advantageous in  
92 that it allows the identification of a broader array of rumen microbial taxa, given that only a  
93 small fraction of the total species have been successfully cultured. However, the most  
94 appropriate method of obtaining a representative rumen sample is still widely debated [18]. It is  
95 well known that the bacterial populations between the solid and liquid portions of the rumen  
96 digesta differ in microbial composition, suggesting that the sampling method used will affect the

97 characterization of the microbial community [19–24]. Thus, identifying sampling methods that  
98 accurately represent both the liquid and solid fractions of the rumen digesta are necessary.

99       Much of the existing research describing the rumen microbiome was performed on  
100 animals surgically fitted with rumen cannula, which offer the accuracy and convenience of  
101 sampling both liquid and solid rumen digesta directly from the rumen chamber. However, the  
102 surgical fistulation procedure is invasive, and the costs associated with the procedure as well as  
103 the ongoing animal care limit the number of animals that can feasibly be used in an experiment.  
104 Importantly, if microbial biomarkers of health or disease are identified for on-farm testing,  
105 retrieving rumen fluid through a cannula is not a practical approach on commercial dairy and  
106 livestock farms. Alternatively, many studies have used an oral stomach tube to collect rumen  
107 fluid without the need for a rumen fistula [8,18,25]. Oral stomach tubes are a cheaper, less  
108 invasive approach to rumen sampling that can be performed on as many cows as necessary, thus  
109 economically increasing the experimental sample size. In terms of bacterial community  
110 composition and diversity, rumen fluid extracted via the fistula was comparable to fluid extracted  
111 via the oral stomach tube [8,26]. Some of the disadvantages of the oral stomach tube include  
112 possible contamination by saliva (which affects the pH of the sample), inconsistent sampling  
113 region within the rumen, stress to the animal, skilled labor associated with use, and limited  
114 representation of particulate matter in samples, though the importance of these concerns to the  
115 microbial composition of the sample are widely debated among researchers [18,27].

116       The collection of fecal material from cattle is another non-invasive, simple, and  
117 inexpensive technique that is not as commonly regarded as a viable tool for collecting samples  
118 representative of the rumen microbiota. Although fecal sampling requires minimal equipment, is  
119 cost-effective, and can be performed easily on any animal, bacterial populations of the feces

120 were found to not reflect the rumen digesta [28,29]. However, in these studies, the fecal  
121 microbiome was not compared with the liquid and solid fractions of the rumen digesta  
122 individually. If the feces reflect the microbial populations in the solid fraction, fecal samples  
123 might be useful in evaluating microbial taxa involved in fiber digestion. Conversely, if fecal  
124 samples represent the liquid fraction, lactate-producing microbes that contribute to ruminal  
125 acidosis could be diagnosed in a less invasive manner.

126 The aim of this study was to identify and compare the bacterial populations present in  
127 samples collected using three methods – an oral stomach tube, fecal samples, and grab sample  
128 through a rumen fistula. To the authors' knowledge, no studies have considered this variety of  
129 sampling methods on a comparative basis using next generation sequencing. Our results will be  
130 useful in helping investigators design experiments that capture their microbial populations of  
131 interest.

## 132 **Materials and methods**

### 133 **Animals**

134 The experimental protocol and all procedures used in this study were approved by the UC  
135 Davis Institutional Animal Care and Use Committee. Four non-lactating Holstein (3) and Jersey  
136 (1) cows, each ruminally fistulated prior to the study, were used for the collection of samples.  
137 For the two-week duration of the study, cattle were housed individually with ad libitum access to  
138 water and offered the same maintenance total mixed ration (TMR) twice daily at approximately  
139 08:00 and 16:00. Dietary composition of TMR was analyzed for protein, fiber, mineral, and  
140 energy content (Cumberland Valley Analytical Services, Hagerstown, MD; Table 1).

**TABLE 1 | Dietary Composition of Total Mixed Ration**

| Item <sup>a</sup> | Dietary Composition <sup>b</sup> |
|-------------------|----------------------------------|
|-------------------|----------------------------------|

|     |                                |                     |
|-----|--------------------------------|---------------------|
| 141 | <b>Moisture</b>                | 11.1%               |
| 142 | <b>Dry matter</b>              | 88.9%               |
| 143 | <b>Crude protein</b>           | 10.7% DM            |
| 144 | <b>Adjusted protein</b>        | 91.4% CP, 9.8% DM   |
| 145 | <b>Soluble protein</b>         | 28.6% CP, 3.1% DM   |
| 146 | <b>ADF</b>                     | 78.5% NDF, 36.7% DM |
| 147 | <b>aNDF</b>                    | 46.8% DM            |
| 148 | <b>Ash</b>                     | 9.62% DM            |
| 149 | <b>Calcium</b>                 | 0.33% DM            |
| 150 | <b>Phosphorus</b>              | 0.22% DM            |
| 151 | <b>Magnesium</b>               | 0.25% DM            |
| 152 | <b>Potassium</b>               | 1.91% DM            |
| 153 | <b>Sodium</b>                  | 0.08% DM            |
| 154 | <b>Iron</b>                    | 449 ppm             |
| 155 | <b>Zinc</b>                    | 54 ppm              |
| 156 | <b>Copper</b>                  | 8 ppm               |
| 157 | <b>TDN</b>                     | 57.5% DM            |
| 158 | <b>Net energy lactation</b>    | 0.59 Mcal/lb        |
| 159 | <b>Net energy maintenance</b>  | 0.56 Mcal/lb        |
| 160 | <b>Net energy gain</b>         | 0.30 Mcal/lb        |
| 161 | <b>Non fiber carbohydrates</b> | 32.9% DM            |

162  
163

164 **Table 1:** Chemical composition of the total mixed-ration (TMR) fed to the rumen-fistulated dry  
 165 cows. Dietary analysis conducted by Cumberland Valley Analytical Services (Hagerstown, MD)  
 166 completed 12/01/2016. Ingredient composition of TMR on an as is a basis was 50% wheat hay,  
 167 25% alfalfa hay, 21.4% almond hulls and 3.6% mineral supplement. <sup>a</sup>Acid detergent fiber

168 (ADF); Ash free Neutral Detergent Fiber (aNDF); Total Digestible Nutrients (TDN). <sup>b</sup>Dry  
169 Matter (DM); Crude Protein (CP); Neutral Detergent Fiber (NDF).

## 170 **Sampling**

171 Cows were given a one-week period for environmental adaption prior to sampling. This  
172 adaptation period was necessary to allow them to acclimate to an individual (rather than group)  
173 feeding approach and to reduce sorting of the feed. All cows were fed the maintenance TMR diet  
174 (Table 1) prior to and throughout the study. Sampling of fecal and ruminal contents occurred on  
175 days 7, 9, and 11 of the experiment, and took place approximately 4 hours after morning feeding.  
176 Fecal samples were collected from the rectum with sterile polyethylene gloves and stored in  
177 plastic bags. Grab samples (containing both liquid and particulate matter) from the fistula were  
178 collected from the medioventral region of the rumen and stored in plastic bags. Rumen liquid  
179 was collected from the fistula using a PVC pipe, Tygon® tubing, and a large syringe, and stored  
180 in 240 ml sterile plastic vials. The Tygon® tubing was thoroughly rinsed and bleached between  
181 cows to avoid cross-contamination of samples. For liquid strained samples, about 250 ml of  
182 liquid sample was squeezed through 4 layers of cheesecloth to remove large particles, as is  
183 common done [19,30,31]. For solid samples, similar squeezing through a cheese cloth was  
184 applied to remove liquid from the solid digesta content, before being stored in plastic bags. On  
185 days 9 and 11, the first aliquot of rumen liquid, containing both liquid and solid particulates, was  
186 additionally collected as a liquid unstrained sample in 240 ml sterile plastic vials. Lastly, enough  
187 rumen liquid to fill a 240 mL sterile plastic vials, which was collected via an oral stomach tube  
188 using an oral speculum, Tygon® tubing (1.5cm O.D. and 0.9cm I.D.) and a vacuum pump. A  
189 fresh tube was used for each cow to avoid cross-contamination of samples. The pH of each of the  
190 liquid-containing samples was measured with a portable pH meter (Milwaukee Instruments,



191 Rocky Mount, NC). All samples were held on ice during transport and stored in triplicate 60 ml  
192 vials at -20°C for DNA extraction and dry matter analysis.

## 193 **DNA extraction and PCR amplification**

194 DNA extraction was performed using a ZR Fecal DNA MiniPrep™ kit (Zymo Research  
195 Corp., Irvine, CA), with slight modifications to the manufacturer's instructions. Samples were  
196 thawed at room temperature, and 200 mg of each sample were used for DNA extraction, which  
197 included a bead bashing step to facilitate the mechanical lysis of microbial cell walls. As the last  
198 step in the procedure, DNA was eluted from the column with elution buffer, and the resulting  
199 DNA was evaluated for concentration and purity on a NanoDrop 2000 spectrophotometer  
200 (Thermo Scientific, Waltham, MA, USA) and stored at -20°C. The V4 region of the bacterial  
201 16S rRNA gene was amplified from each sample using forward primer F515 containing a unique  
202 8 bp barcode (N) and linker region (GT) (5'-NNNNNNNNGTGTGCCAGCMGCCGCGGTAA-  
203 3') and the reverse primer R806 (5'-GGACTACHVGGGTWTCTAAT-3'). The amplification  
204 was carried out in triplicate using GoTaq® Green Master Mix (Promega, Madison, WI) as  
205 previously described [32]. In brief, PCR conditions were set at initial denaturation for 94°C for 3  
206 min; followed by 35 cycles of 94°C for 45 seconds, 50°C for 1 min, 72°C for 90 seconds with  
207 final extension step at 72°C for 10 min. Triplicates were combined in equal concentrations and  
208 amplicons were evaluated for off target bands by gel electrophoresis, pooled and then purified  
209 using a QIAquick PCR Purification Kit (QIAGEN, Hilden, Germany). A 50µl aliquot of the final  
210 pooled PCR product was sequenced at the UC Davis Genome Center DNA Technologies Core  
211 via the Illumina MiSeq PE250 platform (Illumina, CA).

## 212 **Amplicon library processing**

213 Raw paired end reads were screened to remove phiX, human and host contamination  
214 using Kneaddata v0.6.1 by aligning reads to the phiX174 (NCBI ACC: NC\_001422.1), bovine  
215 (ARS-UCD1.2) and human (GRCh38) reference genomes [33]. Reads were demultiplexed  
216 followed by trimming of primers and barcodes with Cutadapt v1.18 [34]. Ends of reads were  
217 trimmed for quality, any read smaller than 150bp was discarded and a max expected error of 2  
218 was used as a quality filter using the filterAndTrim function from DADA2 v1.8.0 [35].  
219 Sequences were merged, denoised, chimeras were removed and exact amplicon sequence  
220 variants (ASVs) were identified using DADA2. Taxonomy was assigned using the RDP native  
221 Bayesian classifier algorithm in the DADA2 assignTaxonomy function with Silva reference  
222 database v.132 training set. A phylogenetic tree of unique ASVs was made using FastTree with  
223 default options in QIIME v.1.9.1 [36]. The ASV table, sequences and tree produced by DADA2  
224 were imported into the R package Phyloseq v.1.24.2 for further analysis [37].

## 225 **Microbial community analyses and statistics**

226 First, unsupervised exploratory analysis was conducted with double principal coordinates  
227 analysis (DPCoA), which was calculated and graphed with the phyloseq R package [37,38]. Both  
228 modeling and hypothesis testing of differentially abundant ASVs between sample types was  
229 determined using the Corncob R package [39]. All genera-level and ASV-level relative  
230 abundances were modeled using a beta-binomial regression with a logit-link for mean and  
231 dispersion as described by Martin et al [39]. Differential abundance was modeled as a linear  
232 function of sample type, cow and day. Significant differentially abundant ASVs were determined  
233 with the parametric Wald test with bootstrapping (n=1000) as described by Martin et al [39].  
234 Within the Corncob algorithm the Benjamini-Hochberg (BH) adjustment for multiple  
235 comparisons was used to calculate adjusted *p* values. An adjusted *p* value  $\leq 0.05$  was considered

236 significant. This model has the benefit of accommodating the absence of a taxon in samples  
237 without zero-inflation or pseudocounts, accounts for differences in library sizes, give valid  
238 inference even with small samples [39]. Richness of sample types was estimated with the R  
239 package breakaway and evenness was calculated using the R package DivNet, which accounts  
240 for the structure of microbial communities [40,41]. Hypothesis testing of alpha diversity  
241 (richness and evenness) metrics was done using the betta() function using sample type, cow and  
242 day as fixed effects in the breakaway R package [42]. Beta diversity was calculated by using  
243 unweighted UniFrac distances and graphed by PCA clustering in the Phyloseq R package [37].  
244 The number of clusters in the data was determined with the gap statistic using the gapstat\_ord()  
245 function in Phyloseq [43].

## 246 **Data availability**

247 Scripts for sequence processing and analysis, interactive graphs, R objects as well as an  
248 Rmarkdown file to reproduce figures in this paper can be found  
249 at <https://doi.org/10.5281/zenodo.4026849>. Raw sequencing files are available through the  
250 Sequence Read Archive under the study accession number PRJNA692782.

## 251 **Results**

### 252 **Sequence processing of rumen and fecal samples**

253 After filtering with Kneaddata and demultiplexing the single run of MiSeq yielded  
254 747,961 250bp raw paired-end reads that entered the DADA2 pipeline. After the quality  
255 trimming, initial filtering, and chimera removal, the library size ranged from 2,189 to 24,624  
256 reads, with a median library size of 7,197 and an average size of 8,110 reads. The median read  
257 length of quality filtered merged reads was 257bp. A total of 5,607 AVSs were identified, of

258 which 94 weren't assigned to a phylum and thus were removed for analysis along with 12 ASVs  
259 assigned to chloroplasts and mitochondria. The 94 unassigned taxa were found in all sample  
260 types with solid samples having the most reads of unknown taxa. This suggests there are is still a  
261 diverse group of microbes attached to solid particles that have yet to be identified. The final  
262 feature table had 5,485 ASVs across 68 samples.

## 263 **Community composition of all sample types**

264 The 5,485 ASVs were assigned to 21 phyla, 78 orders, 117 families, and 293 genera.  
265 Here we define major phyla as those with a mean relative abundance in at least one sample type  
266 of greater than 3%. Major phyla were Firmicutes, Bacteroidetes, Kiritimatiellaeota,  
267 Proteobacteria, Euryarchaeota and Spirochaetes (Fig 1A). Of these major phyla, Firmicutes was  
268 significantly lower in relative abundance ( $P \leq 0.0001$ ; Fig 1C) while Bacteroidetes and  
269 Proteobacteria had significantly higher relative abundance in feces and liquid samples as  
270 compared with grab samples ( $P \leq 0.002$ ; Fig 1C). In addition, Kiritimatiellaeota was  
271 significantly higher in relative abundance in stomach tube and liquid samples compared to grab  
272 samples ( $P \leq 0.001$ ; Fig 1C). Spirochaetes was significantly lower in relative abundance in feces,  
273 stomach tube and solid samples compare with grab samples ( $P \leq 0.003$ ; Fig 1C). While  
274 Euryarchaeota had significantly lower relative abundance in feces, it had significantly higher  
275 relative abundance in stomach tube samples compared with grab samples ( $P = 3.24 \times 10^{-8}$ ). Minor  
276 phyla were those with less than 3% relative abundance in all samples (Fig 1B). An interactive  
277 version of Figure 1B with mean and standard deviations for each phyla is available at  
278 <https://doi.org/10.5281/zenodo.4026849> as interactive Fig 1 – minor phyla. The phylum  
279 Gemmatimonadetes was only found in stomach tube samples and Deferribacteres was only found  
280 in fecal samples (Figure 1B). For the minor phyla in feces Tenericutes, Patescibacteria,

281 Actinobacteria, Fibrobacteres, Chloroflexi and Synergistetes were significantly lower in relative  
282 abundance and Verrucomicrobia, Epsilonbacteraeota, Cyanobacteria, Planctomycetes and  
283 Lentisphaerae were significantly higher in relative abundance compared with grab samples ( $P \leq$   
284 0.001; Figure 1C). Samples acquired with the oral stomach tube had significantly lower relative  
285 abundance of Patescibacteria and Fibrobacteres and significantly higher relative abundance of  
286 Verrucomicrobia, Epsilonbacteraeota, and Fusobacteria compared with grab samples. Only  
287 1.68% of ASVs were assigned a species, but 67.3% were able to be assigned to a genus.

288 **Fig 1. Relative abundance of (A) major and (B) minor phyla and (C) their differential**  
289 **abundances.** (A) Relative abundance of major phyla defined as those phyla found at greater than  
290 3% relative abundance and graphed as relative abundance  $\pm$  SE. (B) Minor phyla defined as  
291 those found below 3% relative abundance present in sample types. (C) Phyla that are  
292 significantly differentially abundant compared with grab samples. Graphed as coefficients with a  
293 95% confidence interval from the corncob model. Families with negative coefficients for a  
294 sample type are expected to have a lower relative abundance when compared to the grab samples  
295 while positive coefficients suggest a higher relative abundance in that sample type compared to  
296 grab samples.

297 Liquid unstrained and fecal samples were the least variable samples as they shared 510  
298 and 441 ASVs, respectively, with samples of their own type. On the other hand, stomach tube  
299 and liquid strained samples were the most variable as these sample types only shared 225 and  
300 307 ASVs, respectively, with samples of their own type. Moderately variable sample types were  
301 grab and solid samples, which shared 319 and 405 ASVs, respectively, with samples of their own  
302 type.

## 303 **Diversity**

304 The evenness of fecal samples was significantly lower than all rumen sample types ( $P \leq$   
305 0.001; Fig 2A). Fecal, stomach tube, and liquid strained samples had significantly lower  
306 evenness than grab samples ( $P \leq 0.001$ ; Fig 2A). Solid and liquid unstrained samples did not  
307 have significantly different evenness compared with grab samples ( $P \geq 0.05$ ; Fig 2A). Both the  
308 individual cow sampled and day of sampling significantly affected the evenness of a sample ( $P \leq$   
309 0.05; Fig 2A).

310 **Fig 2. Differences in estimated alpha diversity among sample types.** (A) DivNet estimate of  
311 Shannon diversity plotted as mean with a 95% confidence intervals and (B) mean breakaway  
312 estimate of species richness with 95% confidence intervals. Both the richness and evenness of  
313 fecal samples were significantly lower than all other rumen sample types ( $P \leq 0.001$ ). Stomach  
314 tube and Liquid strained samples had significantly lower evenness than grab samples ( $P \leq$   
315 0.001). Solid and stomach tube samples were estimated to have significantly fewer species than  
316 grab samples ( $P = 0.02$  and  $P \leq 0.001$ , respectively).

317 The richness of samples from the rumen were estimated to be significantly higher than  
318 that of fecal samples ( $P \leq 0.001$ ; Fig 2B). Fecal samples were estimated to have a mean of 2,021  
319 species, which was significantly lower than the grab samples estimated mean of 4,119 species ( $P$   
320  $\leq 0.001$ ; Fig 2B). Liquid strained and unstrained samples did not have a significantly different  
321 mean number of estimated species compared with grab samples ( $P \geq 0.05$ ; Fig 2B). However,  
322 solid and stomach tube samples were estimated to contain a significantly lower number of  
323 species compared with grab samples, 286 and 506, respectively ( $P = 0.02$ ,  $P \leq 0.001$ ; Fig 2B).  
324 Neither the day sampled nor individual cow had a significant effect on the number of species in a  
325 sample ( $P \geq 0.05$ ; Fig 2B).

326 Weighted UniFrac distances were calculated to determine beta diversity. Calculations of  
327 eigenvalues showed that 86.8% of the variance between samples was contained in the first two  
328 principle components, thus a two-dimensional visualization was deemed appropriate (Fig 3).  
329 Two distinct groups were present with fecal samples clustering away from all rumen sample  
330 types (Fig 3). Grab and solid samples exhibited low variability and overlapped each other,  
331 forming one group. Liquid samples were further down the second axis, which might indicate that  
332 there were distinct phylogenetic differences between these samples and grab samples. Stomach  
333 tube samples were the most variable with some of these samples found within the grab and solid  
334 sample cluster, while other stomach tube samples were more closely associated with liquid  
335 samples. The gap statistic of the weighted UniFrac strongly suggested there were at least 3-5  
336 clusters in the data. As there are six sample types in the dataset, this suggests that grab and solid  
337 samples are likely one cluster as these samples overlap the most (Fig 3). The unweighted  
338 UniFrac showed a similar pattern, with less variation explained in axis one and two, 45.8% and  
339 6.9%, respectively (data not shown).

340 **Fig 3. Beta diversity as weighted UniFrac distances between samples.** To faithfully reflect  
341 the variance in the coordinates, the height-to-width ratio was based on the ratio between the  
342 corresponding eigenvalues.

### 343 **Overall differences between sample types**

344 As an exploratory first step, DPCoA was performed (Fig 4A). An interactive version of  
345 this graph with taxon identification is available at <https://doi.org/10.5281/zenodo.4026849> as  
346 interactive figure 2 – DPCoA. Additionally, since Firmicutes and Bacteroidetes dominated a  
347 majority of the graph, a version without these phyla was created at and is available at  
348 <https://doi.org/10.5281/zenodo.4026849> as interactive Fig 3 – DPCoA\_NoFrimBact with the aim

349 to allow a better visualization of minor phyla. This phylogenetic ordination method provides a  
350 biplot representation of both samples and taxonomic categories. The DPCoA was used to  
351 identify the underlying structure of these data and identify taxa that could be contributing to  
352 differences between sample types that will be specifically examined with differential abundance  
353 testing.

354 **Fig 4. Double principal coordiant analysis (DPCoA) of the Bray-Curtis distances among**  
355 **samples.** DPCoA is a phylogenetic ordination method and that provides a biplot representation  
356 of both (A) samples and (B) taxonomic categories. Note that while the biplots are a square shape  
357 to fit the page the CS1 explains roughly twice the variation of CS2 similar to what is seen in Fig  
358 1. The 1<sup>st</sup> axis discrimates fecal from rumen samples while the 2<sup>nd</sup> axis separtes liquid strained  
359 samples from other rumen sample types. Samples that have larger scores on CS1 have a subset of  
360 taxa from Bacteroidetes and Firmicutes that is different than rumen samples. Liquid strained  
361 samples have lower values on CS2 suggesting they are distinguished from other rumen sample  
362 types by taxa in the phylum Kiritimatiellaeota and *Prevotellaceae*. Fecal samples are predicted to  
363 have lower abundance of *Lachnospiraceae* and greater abundance of *Ruminococcaceae*.

364 Fecal samples clustered away from samples that were collected from the rumen, which  
365 was primarily driven by differences in the relative abundance of a subset of Firmicutes in the  
366 families *Ruminococcaceae*, *Lachnospiraceae* and *Christensenellaceae* and a subset of families in  
367 the phylum Bacteroidetes, mainly *Rikenellaceae* and *Prevotellaceae* on the 1<sup>st</sup> axis (Fig 4B).  
368 Additionally, fecal samples separate from samples from the rumen based on having more taxa  
369 from the family *Akkermansiaceae* and phylum Tenericutes and fewer from the families  
370 *Fibrobacteraceae*, and *Spirochaetaceae* (Fig 4B and S1 Fig). Liquid samples were found lower  
371 on the 2<sup>nd</sup> axis of the DPCoA, indicating these samples had more taxa from the phylum



372 Kiritimatiellaeota and a subset of Bacteroidetes most of them in the family *Prevotellaceae* (Fig  
373 4B). Also, the separation of liquid strained samples away from other rumen samples was due to  
374 fewer taxa from the phylum Euryarchaeota and the family *Eggerthellaceae* that is within the  
375 phylum Actinobacteria (S1 Fig).

376 To test the significance of these differences, differential abundance testing was performed  
377 with Corncob. All sample types were compared to grab samples as a base line, because it is  
378 considered the gold standard for surveying microbial communities in the rumen. The relative  
379 abundance of *Prevotellaceae* was significantly lower in feces and was significantly higher in  
380 liquid samples compared with grab samples ( $P \leq 0.0004$ ; Fig 5A and 6). Stomach tube ( $P = 0.06$ )  
381 and solid ( $P = 0.77$ ) samples were not significantly different in the relative abundance of  
382 *Prevotellaceae* compared with grab samples. The relative abundance of *Prevotellaceae* was  
383 highest in liquid strained samples compared with other sample types (Fig 5A). In comparison to  
384 grab samples, the relative abundance of *Ruminococcaceae* was significantly higher in feces ( $P \leq$   
385  $0.001$ ; Fig 5B) and solid ( $P = 0.003$ ; Fig 5B) samples while liquid strained samples had  
386 significantly lower relative abundance ( $P \leq 0.001$ ; Fig 5B). Neither stomach tube nor liquid  
387 unstrained samples had significantly different relative abundance of *Ruminococcaceae* compared  
388 with grab samples. Fecal samples were lower in relative abundance of *Lachnospiraceae*  
389 compared with all other samples ( $P \leq 6.96 \times 10^{-15}$ ), while relative abundance was higher for grab  
390 samples compared with all other sample types ( $P \leq 0.03$ ; Fig 5C). Neither day of sampling nor  
391 individual animal significantly affected the relative abundance of *Prevotellaceae* ( $P \geq 0.05$ ). In  
392 contrast, the relative abundance of *Ruminococcaceae* and *Lachnospiraceae* was significantly  
393 affected by individual animal ( $P \leq 0.03$ ), but not day of sampling.

394 **Fig 5. Significant differences in the relative abundance of specific bacterial families.**

395 Relative abundance of (A) *Prevotellaceae* (B) *Ruminococcaceae* and (C) *Lachnospiraceae* as  
396 modeled by corncob. Points are the estimated relative abundance and bars are a 95% prediction  
397 interval for each cow on different days of sampling.

398 **Specific community differences between grab and fecal samples**

399 To further distinguish what taxa were contributing to the separation of fecal samples from  
400 rumen samples on the DPCoA, we identified taxa that were found in one sample type and not the  
401 other. Within the phyla Firmicutes and Bacteroidetes, families *Barnesiellaceae*,  
402 *Chitinophagaceae*, *p-2534-18B5\_gut\_group*, *GZKB124*, and *Hymenobacteraceae* were found in  
403 fecal samples, but were not found in grab samples. Conversely, *Leuconostocaceae*,  
404 *Carnobacteriaceae*, *Aerococcaceae*, *Syntrophomoadaceae*, *Bacteroidetes\_DB2-2*, *PeH15*,  
405 *M2PB4-65\_termite\_group*, *COB\_P4-1\_termite\_group*, *Spirosomaceae*, and  
406 *Porphyromonadaceae* were found in grab samples, but were not found in fecal samples.

407 Next, we identified ASVs, genera and families that were differentially abundant between  
408 sample types. There were 657 significant differentially abundant ASVs in fecal samples  
409 compared with grab samples, as well as 114 differentially abundant genera ( $P \leq 0.05$ ; S2 Fig). At  
410 the genera level, 131 ASVs were unable to be fit to the Corncob model for differential  
411 abundance testing. Primarily, this was due to either limited or lack of reads in one of the sample  
412 types. Of these genera that didn't fit the model, *Acetatifactor*, *Shuttleworthia*, *Succinivibrio*,  
413 *Veillonellaceae UCG-001*, and *Lachnospiraceae UCG-006* were found in all grab samples with  
414 greater than or equal to 50 reads across all samples, but absent in fecal samples. Similarly, there  
415 were 11 genera found in all fecal samples with 50 or more reads, but these were not found in any  
416 grab samples including *Coprococcus 3*, *Cellulosilytium*, *Clostridioides*, *Paeniclostridium*,

417 *Parasutterella, Aeriscardovia, Odoribacter, Harryflintia, Negativibacillus, Pygmaibacter,* and  
418 *Ruminococcaceae UCG-011.*

419         The most common families with differentially abundant ASVs were *Lachnospiraceae,*  
420 *Ruminococcaceae, Christensenellaceae, Family XIII, Rikenellaceae,* and *Prevotellaceae.* These  
421 families are in the phyla Firmicutes and Bacteroidetes, which had the most significant  
422 differentially abundant ASVs. However, as a percent of total ASVs these phyla only had 4.9%  
423 and 16.3% significant differentially abundant ASVs, respectively. In contrast, 25.6% of the  
424 ASVs assigned to Chloroflexi and 29.5% of ASVs assigned to Euryarchaeota were significantly  
425 different between grab and fecal samples. The significant ASVs in Chloroflexi were all assigned  
426 to the genus *Flexilinea.* In addition to the significantly lower abundance of some Chloroflexi  
427 ASVs in fecal samples compared with grab samples, another 51.3% of the ASVs in the phyla  
428 were not found in any fecal samples (S2 Fig). In the phylum Euryarchaeota, feces had  
429 significantly lower abundance of *Methanobrevibacter, Methanosphaera,* and were almost devoid  
430 of *Methanomethylophilaceae.*

431         There were 30 families that had significantly lower relative abundance while 18 families  
432 had higher relative abundance between fecal and grab samples (Fig 6). Families that had the  
433 strongest positive relationship with fecal samples were *Peptostreptococcaceae* ( $P = 1.76 \times 10^{-7}$ ;  
434 Fig 7A), *Akkermansiaceae* ( $P = 6.95 \times 10^{-5}$ ; Fig 7B), and *Bacteroidaceae* ( $P = 7.87 \times 10^{-12}$ ; Fig  
435 7C), which were significantly higher in relative abundance compared with grab samples.  
436 Conversely, the families with largest negative relationship between fecal and grab samples that  
437 had significantly lower relative abundance were *Veillonellaceae* ( $P = 1.66 \times 10^{-11}$ ; Fig 7D) and  
438 Bacteroidales\_BS11\_gut\_group ( $P = 6.20 \times 10^{-11}$ ; Fig 7E). Additionally, fecal samples separated  
439 from rumen samples on the DPCoA (S1 Fig) due in part to differences in the families

440 *Spirochaetaceae* and *Fibrobacteraceae* both of which had significantly lower relative abundance  
441 than grab samples ( $P = 7.88 \times 10^{-9}$ ;  $P = 4.73 \times 10^{-8}$ , respectively Fig 7F).

442 **Fig 6. Families that were significantly differentially abundant across sample type compared**  
443 **with grab samples.** Graphed as coefficients with a 95% confidence interval calculated from the  
444 corn cob model. Families with negative coefficients for a sample type are expected to have a  
445 lower relative abundance when compared to the grab samples while positive coefficients suggest  
446 a higher relative abundance in that sample type compared to grab samples.

447

448 **Fig 7. Significant differences in the relative abundance of specific bacterial families between**  
449 **fecal and grab samples.** Fecal samples had significantly higher relative abundance of (A)  
450 *Peptostreptococcaceae*, (B) *Akkermansiaceae*, (C) *Bacteroidaceae*, compared to grab samples.  
451 Also, there was significantly lower relative abundance of (D) *Veillonellaceae*, (E)  
452 Bacteroidales\_BS11\_gut\_group and (F) *Spirochaetaceae* compared to grab samples. Points are  
453 the estimated relative abundance and bars are a 95% prediction interval for each cow on different  
454 days of sampling.

455 Based on the DPCoA findings, the phyla Spirochaetes and Actinobacteria also played an  
456 important role in distinguishing feces from grab samples (Fig 1A and 4B). In the phylum  
457 Spirochaetes, there were 10 ASVs, all of which were from the genera *Treponema\_2*, that had  
458 significantly lower relative abundance in fecal samples compared with grab samples. Within the  
459 phylum Actinobacteria, there were 4 ASVs in the genera *Olsenella*, 5 ASVs in *Atopobium*, 7  
460 ASVs in the genera *DNF00809*, and 1 ASV assigned to *Raoultibacter*, which were all  
461 significantly lower in relative abundance compared with grab samples.

## 462 **Specific community differences between grab and stomach tube** 463 **samples**

464 Oral stomach tube samples were composed of 20 phyla, 65 orders, 98 families, and 236  
465 genera. There were 255 ASVs found in grab samples that were not found in the stomach tube  
466 samples. Likewise, 404 ASVs in stomach tube samples were not present in the grab samples.  
467 There were 3,615 ASVs that were in common between stomach tube and grab samples. Three  
468 families *Rhodobacteraceae*, *Bacteriovoraceae*, and *Spirosomaceae* were found in grab samples,  
469 but were not present in stomach tube samples. The 5 families found in stomach tube samples, but  
470 not in grab samples were *Cellvibrionaceae*, *Neisseriaceae*, *Bifidobacteriaceae*, *Micrococcaceae*,  
471 and *Solirubrobacteraceae*.

472 In addition to the taxa not found in a particular sample type, there were 13 families, 43  
473 genera, and 199 ASVs significant differentially abundant between stomach tube and grab  
474 samples. *Lachnospiraceae*, *Ruminococcaceae*, *Prevotellaceae*, and *Erysipelotrichaceae* were the  
475 most common families to have significant differentially abundant ASVs in stomach tube versus  
476 grab samples. The relative abundance of 39 ASVs in the family *Lachnospiraceae* were  
477 significantly lower while 15 were significantly higher in comparison to grab samples. At the  
478 genus level, 15 genera in the family *Lachnospiraceae* were significantly lower in abundance,  
479 while *Blautia*, *Acetitomaculum* and *Howardella* were the only genera that had higher relative  
480 abundance (S2 Fig). While *Ruminococcaceae* in stomach tube samples was not significantly  
481 different from grab samples at the family level (Fig 5B), eight genera in this family were  
482 significantly higher in relative abundance between the two sample types. *Prevotellaceae* in  
483 stomach tube samples was not significantly different from grab samples at the family level ( $P =$   
484  $0.055$ ; Fig 5A), but at the genus level, two were significantly lower and one significantly higher.

485 Three genera in the family *Erysipelotrichaceae*, *Catenisphaera*, *Erysipelotrichaceae* \_UCG-009,  
486 and *Erysipelotrichaceae* \_UCG-004 were all significantly higher in stomach tube compared with  
487 grab samples. The only assigned genera in the family *Fibrobacteraceae*, *Fibrobacter*, was  
488 significantly lower in abundance in stomach tubes compared to grab samples (S1 Fig). The genus  
489 *Streptococcus* had significantly higher relative abundance compared with grab samples (Fig 6).

490 The only genus in the phylum Euryarchaeota that had significant differences in  
491 abundance in samples from the stomach tube as compared with those collected from the rumen  
492 was *Methanobrevibacter*. This genus was significantly higher in stomach tube samples. At a  
493 finer resolution, there were only four ASVs assigned to *Methanobrevibacter* and one ASV  
494 assigned to *Methanomethylophilaceae* that were significantly higher in abundance in stomach tube  
495 samples compared with grab samples. However, at the family level three methanogenic families,  
496 *Methanomethylophilaceae*, *Methanobacteriaceae* and *Methanocorpusculaceae*, were not  
497 significantly different between the two sample types.

## 498 **Comparing sub-fractions of the grab sample**

499 Grab samples of rumen contents were placed in cheesecloth and squeezed to create the  
500 liquid strained sample and the solid particulate sample. There were 283 ASVs found in the grab  
501 sample that were not identified in the liquid strained samples. Conversely, there were 3,587  
502 ASVs found in common between grab samples and liquid strained samples.

503 Based on the DPCoA, separation of liquid samples from other rumen sample types was  
504 driven in part by taxa from the phylum Kiritimatiellaeota (Fig 4). ASVs in this phylum were only  
505 assigned down to the order level with all ASVs assigned to WCHB1-41. Seventeen ASVs from  
506 Kiritimatiellaeota were significantly higher in liquid samples compared with grab samples while  
507 these ASVs were not significantly different in solid samples versus grab samples.

508           In addition to Kiritimatiellaeta, the DPCoA suggested that the families *Lachnospiraceae*  
509   and *Prevotellaceae* were also a major cause of differences between liquid and grab samples (Fig  
510   4). Differential abundance testing found that indeed *Lachnospiraceae*, *Ruminococcaceae*, and  
511   *Prevotellaceae* were the most common families to have significant differentially abundant  
512   genera in liquid strained versus grab samples. *Lachnospiraceae* was significantly lower in liquid  
513   samples compared with grab samples ( $P < 2.0 \times 10^{-16}$ ; Fig 5C). Liquid samples had the most  
514   significant differently abundant genera with 22 that had lower relative abundance compared with  
515   grab samples and three with higher. One of these genera with significantly higher relative  
516   abundance was *Howardella*, which was also higher in relative abundance in the stomach tube  
517   samples. Liquid unstrained and liquid strained samples had significantly higher relative  
518   abundance in *Prevotellaceae* than grab samples (Fig 5A). Within that family there was higher  
519   relative abundance of the genera *Prevotella\_1*, *Prevotellaceae\_UCG-003*, *Prevotellaceae\_UCG-*  
520   *001* and lower relative abundance of *Prevotellaceae\_NK3B31\_group* ( $P \leq 0.01$ ; S2 Fig). In the  
521   family *Ruminococcaceae*, there were 7 genera with significantly lower relative abundance.

522           Liquid samples were also differentiated from grab samples by a significantly lower  
523   abundance of Actinobacteria, specifically the family *Eggerthellaceae*, and significantly higher  
524   abundance of Lentisphaerae and Cyanobacteria (Fig 1C). ASVs in the phylum Cyanobacteria  
525   were all within the order *Gastranerothales* and were not classified any lower. Likewise, ASVs  
526   in the phylum Lentisphaerae were only assigned to the family *Victivallaceae* which were  
527   significantly lower in abundance in liquid samples compared with grab samples (Fig 6).

528           In liquid strained samples there were roughly an equal number of ASVs assigned to the  
529   genera *Methanobrevibacter* that were significantly higher and lower in relative abundance  
530   compared with grab samples (Fig 6). Therefore at the genus level there was not a significant

531 difference observed in the abundance of the genera *Methanobrevibacter*. Also, in the same  
532 phylum Euryarchaeota, there was significantly lower relative abundance of *Methanosphaera* in  
533 liquid strained samples when compared with grab samples.

## 534 **Discussion**

535 While other studies looked at differences in the rumen microbiome due to rumen  
536 sampling method, they usually involved different diets and did not include all the sampling  
537 methods presented in the current study. As diet is an important factor that affects the rumen  
538 microbiome, we choose to keep the diet consistent during the study to fully investigate the  
539 differences between sampling methods. To the authors' knowledge, this is the first study to  
540 compare rumen sampling methods utilizing ASVs rather than OTUs. Therefore, this study has  
541 the advantage of identifying AVS that are comparable across studies, which will improve the  
542 reproducibility of sequencing studies of the rumen [44].

543 Kim et al. detected 19 bacterial phyla in the rumen with Firmicutes (57.8%),  
544 Bacteroidetes (26.7%) and Proteobacteria (6.9%) in greatest abundance with the remainder of the  
545 16 phyla less than 3% of the total sequences [45]. In the present study, 21 phyla were identified  
546 in the grab sample and only three phyla were over 3% abundance: Firmicutes (64.3%),  
547 Bacteroidetes (20%) and Spirochaetes (4.1%). This differed from fecal samples where the top  
548 four phyla were Firmicutes (61.2%), Bacteroidetes (32.1%), Verrucomicrobia (1.3%) and  
549 Proteobacteria (1.1%) with the remainder of the phyla observed at less than 1% mean relative  
550 abundance (Fig 1A and 1B). The relative abundance of Firmicutes and Bacteroides in the fecal  
551 samples were similar to what Wong et al. found in fresh manure, but they found Actinobacteria  
552 among the top four phyla rather than Verrucomicrobia [46].



553           The day a sample was collected did not affect the number of species sampled and did not  
554 impact the abundance of *Prevotellaceae*, *Ruminococcaceae* and *Lachnospiraceae*. These  
555 observations agree with previous work that found there was little day-to-day variation in both the  
556 solid and liquid fraction of rumen samples from the same animal [47]. Previous work found  
557 differences between breeds [6,7], while others found minimal to no influence of breed [8,48]. As  
558 we only had one Jersey as part of this study we are unable to determine the impact of breed on  
559 the community composition.

## 560 **Diversity**

561           In the present study, fecal samples had lower richness when compared to grab samples.  
562 This is in agreement with a study that used Faith's Phylogenetic Diversity to compare samples  
563 from esophageal tubing or feces of beef calves [49]. The same result was found using the  
564 number of ASVs present in fecal compared to rumen condense after slaughter [50]. Similar to  
565 fecal samples, we found that samples collected via the esophageal tube had lower richness than  
566 grab samples. Such a finding was expected as microbes adhered to particles would be in low  
567 proportion or excluded in the stomach tube sample, even though the tube used did not have a  
568 screen. Using a stomach tube without a screen allowed the collection of small size particulates  
569 only, whereas the grab samples included small to large particulate sizes. Our finding contradicts  
570 Paz et al. who reported no difference in richness between a rumen sample collected from a  
571 rumen cannula compared with a sample collected via esophageal tube [8]. However, in Paz et al.,  
572 solid particles that adhered to the metal strainer of the esophageal tube were recovered and added  
573 to the esophageal sample to create a sample that was "more adequately representative of the  
574 rumen content", which suggests the authors acknowledge that a sample collected by an  
575 esophageal tube that did not contain particles would not represent rumen contents. However, the

576 research did not address this suggestion by analyzing the rumen contents collected with a  
577 stomach tube without the added solids.

578 Our work also differed from that of Ji et al. who reported the diversity of the bacterial  
579 population was not affected by sample type [51]. Samples in their study included rumen digesta  
580 collected from a cannula that was squeezed through cheese cloth to create a liquid and a solid  
581 fraction for comparison with rumen digesta from a cannula. However, we determined that both  
582 liquid sample types did not have significant differences in the number of taxa observed compared  
583 to grab samples, while solid samples had significantly lower estimated species than grab  
584 samples. The work of Weimer et al. (2017) used a sample cup to collect 100 ml of digesta from  
585 the medio-ventral region of the rumen followed by squeezing through cheese cloth to create a  
586 liquid and a solid sample [31]. While this study found that community diversity and community  
587 richness were greater in solids than liquid, our data showed the opposite. Greater richness in  
588 liquid samples could potentially be explained by the greater relative abundance of  
589 *Prevotellaceae*, the most abundant species in the rumen, compared with the estimated number of  
590 species in solid samples. Jewel et al. found liquid samples to have higher richness than solid  
591 samples in agreement with our data [52].

592 Some of these discrepancies are in part due to differences in the metric used to estimate  
593 richness. All these previous studies reported Chao1 as a measure of richness, but the current  
594 study used breakaway to estimate richness. Many alpha diversity estimates that are ubiquitous in  
595 the literature are highly biased and require statistical adjustments to address this bias, which  
596 Chao1 does not [40,41]. Further, the strong negative bias of Chao1 is even further increased by  
597 the use of rarefying as a means of normalization in the previous studies [53]. It is true that Dr.  
598 Anne Chao proposed that Chao1 could be a useful metric for datasets that skewed toward low-

599 abundance classes as microbiome data does; however, these low abundance counts aren't reliable  
600 due to sequencing platform and PCR errors. Breakaway addresses some short comings of Chao1  
601 by providing an estimate of variance of richness estimates for hypothesis testing, estimating the  
602 number of missing taxa, and adjusting the richness estimate accordingly (bias correction) to  
603 provide a more accurate estimate of richness [41]. While this approach produces large error bars,  
604 the breakaway estimate provides a more accurate reflection of the uncertainty associated with  
605 estimating a true value that can never be known (Fig 2B).

## 606 **Bacterial populations**

### 607 **Rumen samples**

608 Based on the exploratory analysis with the DPCoA, differences between rumen liquid  
609 strained samples and other rumen samples types were driven mainly by *Lachnospiraceae*,  
610 *Prevotellaceae* and Kiritimatiellaeota. *Lachnospiraceae* was significantly lower in liquid  
611 samples and *Prevotellaceae* had significantly higher relative abundance compared with grab  
612 samples (Fig 5A and 5C). Other studies that examine differences between the microbial  
613 communities in liquid and solid phases have reported both *Lachnospiraceae* and  
614 *Ruminococcaceae* in higher and in lower abundance in the liquid samples compared with the  
615 solid [19,54]. These conflicting results could be due to the different diets used in these studies.  
616 Animals on all forage diets had higher abundances of both families in liquid phase, while cattle  
617 on a diet with a forage to concentrate ratio of 70:30 had lower abundances of these families in  
618 the solid phase [19,54]. Lower resolution of the taxa might lend clues as to the cause of these  
619 differing results.

620 In agreement with our study, others have found that *Prevotellaceae* were most abundant  
621 in liquid phase compared with solid phase and the dominant family in the liquid fraction

622 [19,21,22]. *Prevotella sp.* are capable of degrading a wide variety of substrates including pectin,  
623 hemicellulose, protein, fatty acids, and starch [55]. Readily fermentable carbohydrates including  
624 sugars and soluble fiber in the liquid fraction likely support the presence of *Prevotella*. Thus, the  
625 lower abundance of *Prevotella* in samples with increased solid fraction, including grab samples  
626 and solid strained was logical.

627 Our data show that ASVs from Kiritimatiellaeota had significantly higher abundances in  
628 liquid strained samples, but these ASVs were not significantly differentially abundant in solid  
629 versus grab samples (Fig 1A and 1C). These data are in agreement with a study that found  
630 Kiritimatiellaeota in higher proportion in the liquid compared with the solid phase of a yak  
631 rumen [56]. Additionally, an order in this phyla, WCHB1-41, was identified to be part of the  
632 “core microbiome” in liquid samples from the rumen [57]. Kiritimatiellaeota was found in rumen  
633 samples and was in higher abundance from samples of higher methane producers making it a  
634 potentially important microbe to understand in order to possibly reduce methane emissions [58].  
635 Bioinformatic analysis has hypothesized that this phyla uses sodium for a coupling ion to  
636 generate the electrochemical gradient to produce ATP, rather than the typical  $H^+$  [59]. Therefore,  
637 in circumstances when concentrations of  $H^+$  are relatively lower, as when methane emission are  
638 high, this phylum could have a competitive advantage of using sodium as a coupling ion. The  
639 role of this rumen microbe has yet to be understood and our data demonstrates that for  
640 investigators interested in elucidating the role of this microbe in the rumen ecosystem, samples  
641 can be enriched with Kiritimatiellaeota by filtering rumen samples through cheese cloth.

## 642 **Stomach tube samples**

643 In a previous study, when sampling was done by either rumen cannula or esophageal tube  
644 *Prevotellaceae*, *Lachnospiraceae* and *Ruminococcaceae* were the predominate families

645 regardless of the sampling method [8]. Importantly, these authors made a point to include  
646 particles attached to the strainer to capture a representative sample in the rumen. Similarly, in the  
647 present study *Prevotellaceae* and *Ruminococcaceae* (Fig 5A and 5B) were not significantly  
648 different at the family level, while *Lachnospiraceae* was significantly lower in stomach tube  
649 samples (Fig 5C). The lower relative abundance of *Lachnospiraceae*, specifically the genera  
650 *Butyrivibrio* and *Coprococcus*, in samples collected by esophageal tube rather than through a  
651 rumen fistula was also determined in another study (S2 Fig) [60]. However, at a finer resolution  
652 our data showed that these three families had the most significant differentially abundant ASVs  
653 when comparing the stomach tube and grab samples.

654 In agreement with De Menezes et al. who found *Fibrobacter* and *Spirochaetes* in the  
655 solid fraction, the only assigned genera in the family *Fibrobacteraceae*, *Fibrobacter*, was  
656 significantly lower in abundance in stomach tube samples compared with grab samples (Fig 1C,  
657 6 and S2 Fig) as was the family *Spirochaetaceae* (Fig 1C and 6) due to a lower abundance of the  
658 genus *Treponema* (S2 Fig) [61]. Initially, we hypothesized the lower abundance of *Fibrobacter*  
659 species in stomach tube samples would largely be driven by the exclusion of fibrous particles in  
660 the sample as *Fibrobacter* facilitates cellulose degradation in the rumen [62–64]. However,  
661 significantly lower abundances of the family *Fibrobacteraceae* and *Fibrobacter* at the genus  
662 level were seen in solid and liquid unstrained samples compared to grab samples (Fig 6 and S2  
663 Fig). Alternatively, the differences could be attributed to location of rumen sampling.

664 Another fiber adherent bacterium *Ruminococcus flavefaciens* (contained in genus  
665 *Ruminococcus\_1*) did follow the expected pattern of significantly lower abundance in stomach  
666 tube and liquid samples and significantly higher abundance in solid samples compared with grab  
667 samples (S2 Fig). The different distribution of these to cellulolytic species could be reflective of

668 their differential preferences for particular plant tissues, for example structural polysaccharides  
669 of the cell wall, as a growth substrate [65]. For studies that are interested in fibrolytic bacteria  
670 such as *Fibrobacter*, straining the liquid out of the sample does not enrich for these bacteria, but  
671 rather seems to disrupt these communities. Therefore, our data suggests that grab samples are the  
672 best option for examining these populations.

673 An important phylum in defining stomach tube samples was Fusobacteria, which was  
674 significantly higher in abundance in stomach tube samples compared with grab samples (Fig  
675 1C). This difference was driven by the genus *Fusobacterium* (S2 Fig) and to the authors'  
676 knowledge this difference between stomach tube and rumen sampling methods has not been  
677 previously reported. *Fusobacterium necrophorum* is an important target species for improving  
678 rumen efficiency as it degrades lysine, whose dietary deficiency is the most likely to limit milk  
679 production [66,67]. In addition, *F. necrophorum* was reported to be an opportunistic pathogen  
680 that causes liver abscesses in feedlot cattle [68,69]. Our data have identified a previously  
681 unreported difference between rumen and stomach tube samples that would enable monitoring of  
682 this important genus with stomach tube sampling and has implications for both dairy and beef  
683 cattle.

684 Stomach tube samples more closely reflected liquid samples, but stomach tube samples  
685 were highly variable (Fig 3 and S1 Fig). This high variability in microbial community could  
686 reflect the fact that the stomach tube did not have a screen, therefore the solid contribution to the  
687 stomach tube sample was also highly variable. There were 3,615 ASVs that were in common  
688 between stomach tube and grab samples. Two families, *Rhodobacteraceae* and *Spirosomaceae*  
689 were found in grab, liquid strained and liquid unstrained samples, but were not present in  
690 stomach tube samples. However, *Solirubrobacteraceae* was found only in stomach tube samples.

691 These differences could reflect differences in the location of the tube placement (cranial ventral)  
692 compared with the sampling the rumen from the cannula (central rumen).

693 Taken together, these data suggest that stomach tube samples could be reflective of  
694 rumen samples provided some solid particulate are included and attempts are made to place the  
695 tube at a consistent depth. Despite following these precautions, researchers should expect these  
696 samples to be more variable than grab samples and increase their sample size accordingly.

### 697 **Feces vs rumen**

698 In the current study, as anticipated, fecal samples were not representative of the microbial  
699 community of the rumen. The differences between fecal and rumen samples were driven by  
700 differences in two Firmicute families: *Ruminococcaceae* and *Lachnospiraceae* (Fig 4). Indeed, it  
701 was found that there was significantly higher abundance of *Ruminococcaceae* (Fig 5B) and  
702 significantly lower abundance of *Lachnospiraceae* in feces (Fig 5C). Similarly, Noel et al. found  
703 the abundance of *Ruminococcaceae* to be much higher in feces compared with rumen samples  
704 [70]. However, they found no difference in the abundance of *Lachnospiraceae*. A recent preprint  
705 found strikingly similar relative abundances of top three most abundant families in feces from  
706 dairy cattle: *Ruminococcaceae* (34.9% compared to our 40.7%), and *Rikenellaceae* (11.6%  
707 compared to our 15.7%) and *Lachnospiraceae* (6.8% compared to our 7.7%) [71]. These data  
708 show that *Ruminococcaceae* is typically found in higher abundance in feces, while fecal  
709 *Lachnospiraceae* will have lower abundance than the rumen population.

710 Both *Lachnospiraceae* and *Ruminococcaceae* are also members of the human  
711 gastrointestinal tract and have multiple glycoside hydrolases (GH) and carbohydrate-binding  
712 modules (CBM) that allow utilization of complex plant material, and transport degradation  
713 products of various sizes and compositions [72]. Their differences in abundance between the

714 rumen and fecal samples was likely a reflection of their specialization in degrading the various  
715 types of substrates present in these two niches. As both families contain butyrate producers, the  
716 shift in these families could represent a change in the major sources of butyrate in the rumen  
717 compared with the lower colon. The reader should note that there are discrepancies in the  
718 literature as to the taxonomy of genera in *Lachnospiraceae* [73]. Of note is a prominent butyrate  
719 producer *Eubacterium rectale* that is cited as belonging to both *Eubacteriaceae* and  
720 *Lachnospiraceae*, despite its placement on a 16S rRNA gene tree near recognized members of  
721 *Lachnospiraceae* [74]. These inconsistencies can make appropriate comparisons at the level of  
722 family across studies difficult.

723         In addition, to the families that drove the major differences between rumen and feces,  
724 other families were also found to be differentially abundant between these two sample types.  
725 There was significantly higher abundance of *Akkermansiaceae* in feces compared with grab  
726 samples (Fig 6B). Until 2016, *Akkermansiaceae* only contained the species *Akkermansia*  
727 *muciniphila*, when a novel strain, *Akkermansia glycaniphila*, was isolated from the feces of a  
728 reticulated python [75]. Muciniphila means “mucin-loving” in Latin and as its name suggests *A.*  
729 *muciniphila* is a mucin-degrader, which produces acetate and propionate from mucin  
730 fermentation [76]. This species is known to be one of the most abundant in the human colon  
731 making up 0.5-5% of the total bacteria, which was in agreement with the relative abundance we  
732 observed (Fig 7B) [77,78]. Other studies have also noted the higher abundances of *Akkermansia*  
733 in feces compared with rumen samples [28,79]. In humans, *A. muciniphila* had a protective  
734 effect against obesity and played a role in both glucose and lipid metabolism [80,81].  
735 *Akkermansia* also had anti-inflammatory effects that were in part mediated through a membrane  
736 specific protein that interacted with the toll-like receptor-2 and improved gut-barrier function



737 when given orally [82]. Due to the role of *A. muciniphilia* in regulating intestinal inflammation  
738 and fat deposition, a better understanding of its function in cattle could identify methods to  
739 improve weight gain in cattle.

740 Taken together, fecal samples are not an accurate representation of rumen samples as  
741 they have differences in the abundance of predominant families in the phyla Firmicutes and  
742 Bacteroidetes. Fecal samples differed from those taken from the rumen as they had significantly  
743 lower relative abundance of *Lachnospiraceae*, *Christensenellaceae*, *Prevotellaceae*, *Fibrobacter*  
744 and *Treponema* (Fig 5A and C, 6, 7 and S2 Fig). Also, fecal samples had significantly higher  
745 relative abundance of *Ruminococcaceae*, *Rikenellaceae* and *Akkermansia* compared with grab  
746 samples (Fig 5B, 6, 7 and S2 Fig). Researchers can access the freely accessible data found at  
747 <https://doi.org/10.5281/zenodo.4026849> to determine how sampling methods might affect the  
748 abundance of their microbe of interest.

## 749 **Archaeal populations**

### 750 **Feces vs rumen**

751 Methanogens are an important functional group within the rumen as their use of H<sub>2</sub> to  
752 reduce CO<sub>2</sub> to methane (CH<sub>4</sub>) removes H<sub>2</sub> from the rumen that is generated during fermentation  
753 of carbohydrates [83,84]. Methane has a global warming potential 28-34 fold higher than CO<sub>2</sub>  
754 over 100 years, and therefore its mitigation is important to reducing the environmental impact of  
755 animal agriculture. Additionally, methane production is energy inefficient, resulting in a 2-12%  
756 loss in gross energy intake in cattle [85]. There is very limited data on differences between the  
757 archaeal populations in the rumen compared with the feces, as a majority of studies solely focus  
758 on the rumen population.

759           One study that has examined both the rumen and fecal populations of archaea of Nelore  
760 cattle was conducted by Andrade et al. [50]. Like this present study, Andrade et al. also utilized  
761 DADA2 to identify ASVs and assigned taxa with the SILVA database v132; however, they used  
762 different primers that are specific for archaea and bacteria rather than universal primers and  
763 classified archaeal sequences using the Rumen and Intestinal Methanogen database (RIM-DB).  
764 Together these choices allowed Andrade et al. to classify archaeal ASVs down to the species  
765 level, which contrasted with this present study where methanogenic ASVs were only classified  
766 down to the genus level. Other than *Methanobrevibacter* and *Methanosphaera*, the other archaeal  
767 genera that this present study and Andrade et al. identified were different. Our data contained  
768 *Methanocorpusculum*, *Methanimicrococcus* and *Candidatus Methanomethylophilus* while  
769 Andrade et al. observed *Methanomicrobium*. Both studies found that *Methanobrevibacter* and  
770 *Methanosphaera* were found in both the rumen and feces; however, there were differences in the  
771 relative abundances of the main genera. In contrast to Andrade et al. we found significantly  
772 lower relative abundance of *Methanobrevibacter* in fecal samples compared with samples from  
773 the rumen. Despite using similar methods there is not clear agreement as to the differences in  
774 abundance of genera and which genera are present in the two populations.

775           As an alternative to 16S rRNA gene sequencing, the *mcrA* gene can be sequenced to  
776 study methanogens [86,87]. The *mcrA* gene encodes the  $\alpha$ -subunit of the methyl coenzyme M  
777 reductase, which catalyzes the last step of methanogenesis and is conserved among all  
778 methanogens [88]. A study that used *mcrA* amplicon sequencing found that the most abundant  
779 genera in manure was *Methanocorpusculum* while in the rumen it was *Methanobrevibacter* [89].  
780 While we found *Methanocorpusculum* in our fecal samples it was a minor genus and the  
781 discrepancy is most likely explained by differences in the gene amplicon sequences. Taken

782 together these data suggest *Methanobrevibacter* is a dominant archaeal genus in both the rumen  
783 and fecal populations. The lack of data comparing the rumen and fecal populations suggest that  
784 further research is required to understand the archaeal populations.

785

## 786 **Rumen samples**

787 In the present study relative abundance of archaeal families was similar across rumen  
788 samples, both liquid and solid phases, with wide variation in the relative abundance of  
789 *Methanocorpusculaceae* (Fig 6). In contrast, Bowen et al. found methanogens to be more  
790 abundant in the solid phase [19]. Our data more closely agree with de Mulder et al. who found  
791 similar abundance in samples including solid, rumen liquid, and liquid [54]. When we examined  
792 the archaeal ASVs in our data at the genus level, *Methanosphaera* was significantly lower in  
793 relative abundance in liquid samples compared with grab samples. This is in agreement with  
794 previous studies that found *Methanosphaera* was more abundant in the solid phase, rather than the  
795 liquid phase [19,54]. As a whole these data suggest that the collective abundance of methanogens  
796 was similar between solid and liquid phases, but that *Methanosphaera* are found at higher  
797 abundance in the rumen liquid. Studies evaluating feed additives or diet alterations to modulate  
798 methanogen populations in the rumen should consider including the liquid fraction of rumen  
799 fluid to capture changes in the abundance of *Methanosphaera*.

800 At the family level three methanogenic families, *Methanomethylophilaceae*,  
801 *Methanobacteriaceae* and *Methanocorpusculaceae*, were not significantly different between the  
802 grab sample and samples acquired via a stomach tube (Fig 6). However, there were 4 ASVs  
803 assigned to *Methanobrevibacter* that were found to be significantly higher in abundance in  
804 stomach tube samples. This is a paradoxical finding as stomach tube samples typically have

805 more liquid than solid particles in them and we previously noted that *Methanosphaera* was in  
806 higher abundance in liquid samples. As the coefficient for the difference in relative abundance of  
807 *Methanobrevibacter* is low (0.1-0.5), we believe that in practice with higher numbers of animals  
808 this difference would be negligible.

809         Many of the differences described thus far have focused on the major genera  
810 *Methanobrevibacter* and *Methanosphaera*, which are hydrogenotrophic methanogens. While the  
811 hydrogenotrophic pathway for methane production is the most common there are two alternative  
812 pathways: methylotrophic and acetoclastic that utilize methylated compounds and acetate,  
813 respectively. Thus far, only taxa within the order *Methanosarcinales* have been identified to be  
814 capable of acetoclastic methanogenesis [90,91]. An acetoclastic methanogen in our data,  
815 *Methanimicrococcus*, was only present in two liquid samples. There was not a strong pattern as  
816 to the phase in which this minor genus may be found, and as deep sequencing would be required  
817 to determine shifts in its abundance, targeted qRT-PCR would be a better choice to study  
818 abundance of this microbe. In addition, there was one ASV assigned to  
819 *Methnomethylophilaceae*, a methylotrophic archaeon, that was significantly higher in abundance  
820 in stomach tube samples compared with grab samples, although at higher taxonomic levels no  
821 differences were found for the family *Methnomethylophilaceae*.

822         Taken together these results demonstrate that stomach tubing would likely provide a  
823 representative community of major populations of methanogens, *Methanosphaera* and  
824 *Methanobrevibacter*, compared with grab samples. For minor populations accurate surveys  
825 would require more targeted techniques, such as qRT-PCR or mcrA sequencing. While this study  
826 added to an understanding of how sampling methods will potentially impact archaea populations  
827 observed, it should not be considered a comprehensive evaluation of the microbial communities.

828 Specific archaeal primers and qRT-PCR could be used to clarify discrepancies between this  
829 study and past work. However, for those evaluating archaeal communities with 16S rRNA gene  
830 sequencing, this study can serve as a guide to help in study design to improve the chances of  
831 capturing an accurate picture of the taxa of interest.

## 832 **Acknowledgements**

833 We thank the UC Davis DNA Technologies Core for sequencing services. We appreciate the  
834 work of the UC Davis Dairy manager Douglas Gisi and Carlyn Peterson that helped during  
835 sample collection.

## 836 **Funding information**

837 This work was supported by a multistate project #NC2042 JH was supported by the Leland Roy  
838 Saxon and Georgia Wood Saxon fellowship.

## 839 **Author contribution statement**

840 JH analyzed, interpreted data, and wrote manuscript. ML collected samples, prepared libraries,  
841 aided in experimental design and edited manuscript. ED designed the experiment, assisted in  
842 sample collection helped prepared manuscript. EAM edited manuscript.

## 843 **Conflict of interest statement**

844 The authors have not conflicts of interest to declare.

## 845 **Supporting information**

846 **S1 Fig. Double principal coordiant analysis of the Bray-Curtis distance after removal of**  
847 **the phyla Bacteroidetes and Firmicutes from the dataset.** DPCoA is a phylogenetic  
848 ordination method and that provides a biplot representation of both (A) samples and (B)

849 taxonomic categories. The 1<sup>st</sup> axis separates liquid strained samples from other rumen sample  
850 types while the 2<sup>nd</sup> axis discriminates fecal from rumen samples. Samples that have larger scores  
851 on the 1<sup>st</sup> axis have more taxa from the phylum Kiritimatiellaeota and less taxa from the phylum  
852 Euryarchaeota. Likewise, samples with higher scores on the 2<sup>nd</sup> axis have more taxa from the  
853 family Akkermansiaceae and less taxa from the families Fibrobacteraceae and Spirochaetaceae.  
854 To faithfully reflect the variance in the coordinates, the height-to-width ratio was based on the  
855 ratio between the corresponding eigenvalues.

856 **S2 Fig. Significant genera that are differentially abundant across sample type graph as**  
857 **coefficients with a 95% confidence interval calculated from the corncob model.** Taxa with  
858 negative coefficients for a sample type are expected to have a lower relative abundance when  
859 compared to the grab samples while positive coefficients suggest a higher relative abundance in  
860 that sample type compared to grab samples. Taxa are presented with phylum, family, genus and  
861 species to the lowest assigned level.

## 862 **References**

- 863 1. Stewart CS, Flint HJ, Bryant MP. The Rumen Bacteria. 2nd ed. In: Hobson PN, Stewart  
864 CS, editors. The Rumen Microbial Ecosystem. 2nd ed. London: Blackie Academic &  
865 Professional; 1997. pp. 10–72.
- 866 2. Krehbiel CR. INVITED REVIEW: Applied nutrition of ruminants: Fermentation and  
867 digestive physiology. *Prof Anim Sci.* 2014;30: 129–139. doi:10.15232/S1080-  
868 7446(15)30100-5
- 869 3. Jami E, White BA, Mizrahi I. Potential role of the bovine rumen microbiome in  
870 modulating milk composition and feed efficiency. *PLoS One.* 2014;9.  
871 doi:10.1371/journal.pone.0085423

- 872 4. Hernandez-Sanabria E, Goonewardene LA, Wang Z, Durunna ON, Moore SS, Guan LL.  
873 Impact of feed efficiency and diet on adaptive variations in the bacterial community in the  
874 rumen fluid of cattle. *Appl Environ Microbiol.* 2012;78: 1203–1214.  
875 doi:10.1128/AEM.05114-11
- 876 5. Liu C, Meng Q, Chen Y, Xu M, Shen M, Gao R, et al. Role of age-related shifts in rumen  
877 bacteria and methanogens in methane production in cattle. *Front Microbiol.* 2017;8: 1–14.  
878 doi:10.3389/fmicb.2017.01563
- 879 6. Guan LL, Nkrumah JD, Basarab JA, Moore SS. Linkage of microbial ecology to  
880 phenotype: correlation of rumen microbial ecology to cattle’s feed efficiency. *FEMS*  
881 *Microbiol Lett.* 2008;288.
- 882 7. Fan P, Bian B, Teng L, Nelson CD, Driver J, Elzo MA, et al. Host genetic effects upon the  
883 early gut microbiota in a bovine model with graduated spectrum of genetic variation.  
884 *ISME J.* 2020;14: 302–317. doi:10.1038/s41396-019-0529-2
- 885 8. Paz HA, Anderson CL, Muller MJ, Kononoff PJ, Fernando SC. Rumen Bacterial  
886 Community Composition in Holstein and Jersey Cows Is Different under Same Dietary  
887 Condition and Is Not Affected by Sampling Method. *Front Microbiol.* 2016;7: 1–9.  
888 doi:10.3389/fmicb.2016.01206
- 889 9. Noel SJ, Attwood GT, Rakonjac J, Moon CD, Waghorn GC, Janssen PH. Seasonal  
890 changes in the digesta-adherent rumen bacterial communities of dairy cattle grazing  
891 pasture. *PLoS One.* 2017;12: 1–18. doi:10.1371/journal.pone.0173819
- 892 10. Petri RM, Forster RJ, Yang W, McKinnon JJ, McAllister T a. Characterization of rumen  
893 bacterial diversity and fermentation parameters in concentrate fed cattle with and without  
894 forage. *J Appl Microbiol.* 2012;112: 1152–1162. doi:10.1111/j.1365-2672.2012.05295.x

- 895 11. Zhang J, Shi H, Wang Y, Li S, Cao Z, Ji S, et al. Effect of dietary forage to concentrate  
896 ratios on dynamic profile changes and interactions of ruminal microbiota and metabolites  
897 in holstein heifers. *Front Microbiol.* 2017;8: 1–18. doi:10.3389/fmicb.2017.02206
- 898 12. Dehority BA, Orpin CG. Development of, and natural fluctuations in, rumen microbial  
899 populations. In: Hobson PN, Stewart CS, editors. *The Rumen Microbial Ecosystem.*  
900 London, UK: Blackie Academic & Professional; 1997. pp. 196–245.
- 901 13. Kamra DN. Rumen microbial ecosystem. *Curr Sci.* 2005;89: 124–135.
- 902 14. Wolin MJ, Miller HJ. Microbe-Microbe Interactions. 2nd ed. In: Hobson PN, Stewart CS,  
903 editors. *The Rumen Microbial Ecosystem.* 2nd ed. London, UK: Blackie Academic &  
904 Professional; 1997. pp. 467–491.
- 905 15. Hungate RE. *The Rumen and Its Microbes.* The Rumen and its Microbes. New  
906 York-London: Academic Press; 1966. doi:10.1016/b978-1-4832-3308-6.50002-4
- 907 16. Xue M, Sun H, Wu X, Guan LL, Liu J. Assessment of rumen microbiota from a large  
908 dairy cattle cohort reveals the pan and core bacteriomes contributing to varied phenotypes.  
909 *Appl Environ Microbiol.* 2018;84: 1–13. doi:10.1128/AEM.00970-18
- 910 17. Wu S, Baldwin RL, Li W, Li C, Connor EE, Li RW. The Bacterial Community  
911 Composition of the Bovine Rumen Detected Using Pyrosequencing of 16S rRNA Genes.  
912 *Metagenomics.* 2012;1: 1–11. doi:10.4303/mg/235571
- 913 18. Steiner S, Neidl A, Linhart N, Tichy A, Gasteiner J, Gallob K, et al. Randomised  
914 prospective study compares efficacy of five different stomach tubes for rumen fluid  
915 sampling in dairy cows. *Vet Rec.* 2015;176: 50. doi:10.1136/vr.102399
- 916 19. Bowen JM, McCabe MS, Lister SJ, Cormican P, Dewhurst RJ. Evaluation of microbial  
917 communities associated with the liquid and solid phases of the rumen of cattle offered a



- 918 diet of perennial ryegrass or white clover. *Front Microbiol.* 2018;9: 1–8.
- 919 doi:10.3389/fmicb.2018.02389
- 920 20. Cho SJ, Cho KM, Shin EC, Lim WJ, Hong SY, Choi BR, et al. 16S rDNA analysis of  
921 bacterial diversity in three fractions of cow rumen. *J Microbiol Biotechnol.* 2006;16: 92–  
922 101.
- 923 21. Pitta DW, Pinchak WE, Dowd SE, Osterstock J, Gontcharova V, Youn E, et al. Rumen  
924 bacterial diversity dynamics associated with changing from bermudagrass hay to grazed  
925 winter wheat diets. *Microb Ecol.* 2010;59: 511–522. doi:10.1007/s00248-009-9609-6
- 926 22. Schären M, Kiri K, Riede S, Gardener M, Meyer U, Hummel J, et al. Alterations in the  
927 rumen liquid-, particle- and epithelium-associated microbiota of dairy cows during the  
928 transition from a silage- and concentrate-based ration to pasture in spring. *Front*  
929 *Microbiol.* 2017;8. doi:10.3389/fmicb.2017.00744
- 930 23. Lengowski MB, Witzig M, Möhring J, Seyfang GM, Rodehutschord M. Effects of corn  
931 silage and grass silage in ruminant rations on diurnal changes of microbial populations in  
932 the rumen of dairy cows. *Anaerobe.* 2016;42: 6–16. doi:10.1016/j.anaerobe.2016.07.004
- 933 24. McCann JC, Luan S, Cardoso FC, Derakhshani H, Khafipour E, Loor JJ. Induction of  
934 subacute ruminal acidosis affects the ruminal microbiome and epithelium. *Front*  
935 *Microbiol.* 2016;7: 1–18. doi:10.3389/fmicb.2016.00701
- 936 25. Ramos-Morales E, Arco-Pérez A, Martín-García AI, Yáñez-Ruiz DR, Frutos P, Hervás G.  
937 Use of stomach tubing as an alternative to rumen cannulation to study ruminal  
938 fermentation and microbiota in sheep and goats. *Anim Feed Sci Technol.* 2014;198: 57–  
939 66. doi:10.1016/j.anifeedsci.2014.09.016
- 940 26. Lodge-Ivey SL, Browne-Silva J, Horvath MB. Technical note: Bacterial diversity and

- 941 fermentation end products in rumen fluid samples collected via oral lavage or rumen  
942 cannula. *J Anim Sci.* 2009;87: 2333–2337. doi:10.2527/jas.2008-1472
- 943 27. Duffield T, Plaizier JC, Fairfield A, Bagg R, Vessie G, Dick P, et al. Comparison of  
944 techniques for measurement of rumen pH in lactating dairy cows. *J Dairy Sci.* 2004;87:  
945 59–66. doi:10.3168/jds.S0022-0302(04)73142-2
- 946 28. Liu J hua, Zhang M ling, Zhang R yang, Zhu W yun, Mao S yong. Comparative studies of  
947 the composition of bacterial microbiota associated with the ruminal content, ruminal  
948 epithelium and in the faeces of lactating dairy cows. *Microb Biotechnol.* 2016;9: 257–268.  
949 doi:10.1111/1751-7915.12345
- 950 29. Mohammadzadeh H, Yáñez-Ruiz DR, Martínez-Fernandez G, Abecia L. Molecular  
951 comparative assessment of the microbial ecosystem in rumen and faeces of goats fed  
952 alfalfa hay alone or combined with oats. *Anaerobe.* 2014;29: 52–58.  
953 doi:10.1016/j.anaerobe.2013.11.012
- 954 30. Derakhshani H, Tun HM, Cardoso FC, Plaizier JC, Khafipour E, Loor JJ. Linking  
955 Periparturient Dynamics of Ruminal Microbiota to Dietary Changes and Production  
956 Parameters. *Front Microbiol.* 2017;7: 1–13. doi:10.3389/fmicb.2016.02143
- 957 31. Weimer PJ, Cox MS, Vieira de Paula T, Lin M, Hall MB, Suen G. Transient changes in  
958 milk production efficiency and bacterial community composition resulting from near-total  
959 exchange of ruminal contents between high- and low-efficiency Holstein cows. *J Dairy  
960 Sci.* 2017;100: 7165–7182. doi:10.3168/jds.2017-12746
- 961 32. Mon KKZ, Saelao P, Halstead MM, Chanthavixay G, Chang H-C, Garas L, et al.  
962 *Salmonella enterica* Serovars Enteritidis Infection Alters the Indigenous Microbiota  
963 Diversity in Young Layer Chicks. *Front Vet Sci.* 2015;2: 61.

- 964           doi:10.3389/fvets.2015.00061
- 965   33.   McIver LJ, Abu-Ali G, Franzosa EA, Schwager R, Morgan XC, Waldron L, et al.  
966           BioBakery: A meta'omic analysis environment. *Bioinformatics*. 2018;34: 1235–1237.  
967           doi:10.1093/bioinformatics/btx754
- 968   34.   Martin M. Cutadapt removes adapter sequences from high-throughput sequencing reads.  
969           *EMBnet.journal*. 2011;17: 10. doi:10.14806/ej.17.1.200
- 970   35.   Callahan BJ, McMurdie PJ, Rosen MJ, Han AW, Johnson AJA, Holmes SP. DADA2:  
971           High-resolution sample inference from Illumina amplicon data. *Nat Methods*. 2016;13:  
972           581–583. doi:10.1038/nmeth.3869
- 973   36.   Caporaso JG, Kuczynski J, Stombaugh J, Bittinger K, Bushman FD, Costello EK, et al.  
974           QIIME allows analysis of high-throughput community sequencing data. *Nat Methods*.  
975           2010;7: 335–336. doi:10.1038/nmeth0510-335
- 976   37.   McMurdie PJ, Holmes S. Phyloseq: an R package for reproducible interactive analysis and  
977           graphics of microbiome census data. *PLoS One*. 2013;8: e61217.  
978           doi:10.1371/journal.pone.0061217
- 979   38.   Pavoine S, Dufour AB, Chessel D. From dissimilarities among species to dissimilarities  
980           among communities: A double principal coordinate analysis. *J Theor Biol*. 2004;228:  
981           523–537. doi:10.1016/j.jtbi.2004.02.014
- 982   39.   Martin BD, Witten D, Willis AD. Modeling microbial abundances and dysbiosis with  
983           beta-binomial regression. *Ann Appl Stat*. 2020;14: 94–115. doi:10.1214/19-AOAS1283
- 984   40.   Willis AD, Martin BD. Estimating diversity in networked ecological communities.  
985           *Biostatistics*. 2020; 1–16. doi:10.1093/biostatistics/kxaa015
- 986   41.   Willis A, Bunge J. Estimating diversity via frequency ratios. *Biometrics*. 2015;71: 1042–

- 987 1049. doi:10.1111/biom.12332
- 988 42. Willis A, Bunge J, Whitman T. Improved detection of changes in species richness in high  
989 diversity microbial communities. *J R Stat Soc Ser C Appl Stat.* 2017;66: 963–977.  
990 doi:10.1111/rssc.12206
- 991 43. Tibshirani R, Walther G, Hastie T. Estimating the number of clusters in a data set via the  
992 gap statistic. *J R Stat Soc Ser B Stat Methodol.* 2001;63: 411–423. doi:10.1111/1467-  
993 9868.00293
- 994 44. Callahan BJ, McMurdie PJ, Holmes SP. Exact sequence variants should replace  
995 operational taxonomic units in marker-gene data analysis. *ISME J.* 2017;11: 2639–2643.  
996 doi:10.1038/ismej.2017.119
- 997 45. Kim M, Morrison M, Yu Z. Status of the phylogenetic diversity census of ruminal  
998 microbiomes. *FEMS Microbiol Ecol.* 2011;76: 49–63. doi:10.1111/j.1574-  
999 6941.2010.01029.x
- 1000 46. Wong K, Shaw TI, Oladeinde A, Glenn TC, Oakley B, Molina M. Rapid microbiome  
1001 changes in freshly deposited cow feces under field conditions. *Front Microbiol.* 2016;7: 1–  
1002 12. doi:10.3389/fmicb.2016.00500
- 1003 47. Skarlupka JH, Kamenetsky ME, Jewell KA, Suen G. The ruminal bacterial community in  
1004 lactating dairy cows has limited variation on a day-to-day basis. *J Anim Sci Biotechnol.*  
1005 2019;10: 1–5. doi:10.1186/s40104-019-0375-0
- 1006 48. Bainbridge ML, Cersosimo LM, Wright ADG, Kraft J. Rumen bacterial communities shift  
1007 across a lactation in Holstein, Jersey and Holstein × Jersey dairy cows and correlate to  
1008 rumen function, bacterial fatty acid composition and production parameters. *FEMS*  
1009 *Microbiol Ecol.* 2016;92: 1–14. doi:10.1093/femsec/fiw059

- 1010 49. Lourenco JM, Kieran TJ, Seidel DS, Glenn TC, Da Silveira MF, Callaway TR, et al.  
1011 Comparison of the ruminal and fecal microbiotas in beef calves supplemented or not with  
1012 concentrate. *PLoS One*. 2020;15: 1–17. doi:10.1371/journal.pone.0231533
- 1013 50. Andrade BGN, Bressani FA, Cuadrat RRC, Tizioto PC, De Oliveira PSN, Mourão GB, et  
1014 al. The structure of microbial populations in Nelore GIT reveals inter-dependency of  
1015 methanogens in feces and rumen. *J Anim Sci Biotechnol*. 2020;11: 1–10.  
1016 doi:10.1186/s40104-019-0422-x
- 1017 51. Ji S, Zhang H, Yan H, Azarfar A, Shi H, Alugongo G, et al. Comparison of rumen bacteria  
1018 distribution in original rumen digesta, rumen liquid and solid fractions in lactating  
1019 Holstein cows. *J Anim Sci Biotechnol*. 2017;8: 1–7. doi:10.1186/s40104-017-0142-z
- 1020 52. Jewell KA, McCormick CA, Odt CL, Weimer PJ, Suen G. Ruminal bacterial community  
1021 composition in dairy cows is dynamic over the course of two lactations and correlates with  
1022 feed efficiency. *Appl Environ Microbiol*. 2015;81: 4697–4710. doi:10.1128/AEM.00720-  
1023 15
- 1024 53. Willis AD. Rarefaction, alpha diversity, and statistics. *Front Microbiol*. 2019;10.  
1025 doi:10.3389/fmicb.2019.02407
- 1026 54. De Mulder T, Goossens K, Peiren N, Vandaele L, Haegeman A, De Tender C, et al.  
1027 Exploring the methanogen and bacterial communities of rumen environments: solid  
1028 adherent, fluid and epimural. *FEMS Microbiol Ecol*. 2017;93: 1–12.  
1029 doi:10.1093/femsec/fiw251
- 1030 55. Russell JB. *Rumen Microbiology and its Role in Ruminant Nutrition*. Ithaca. New York:  
1031 Dept. of Microbiology, Cornell University; 2002.
- 1032 56. Ren Q, Si H, Yan X, Liu C, Ding L, Long R, et al. Bacterial communities in the solid,

- 1033 liquid, dorsal, and ventral epithelium fractions of yak (*Bos grunniens*) rumen.
- 1034 Microbiologyopen. 2020;9: 1–16. doi:10.1002/mbo3.963
- 1035 57. Wallace JR, Sasson G, Garnsworthy PC, Tapio I, Gregson E, Bani P, et al. A heritable  
1036 subset of the core rumen microbiome dictates dairy cow productivity and emissions. Sci  
1037 Adv. 2019;5. doi:10.1126/sciadv.aav8391
- 1038 58. Auffret MD, Stewart R, Dewhurst RJ, Duthie CA, Rooke JA, Wallace RJ, et al.  
1039 Identification, comparison, and validation of robust rumen microbial biomarkers for  
1040 methane emissions using diverse *Bos Taurus* breeds and basal diets. Front Microbiol.  
1041 2018;8: 1–15. doi:10.3389/fmicb.2017.02642
- 1042 59. Spring S, Bunk B, Spröer C, Schumann P, Rohde M, Tindall BJ, et al. Characterization of  
1043 the first cultured representative of Verrucomicrobia subdivision 5 indicates the proposal of  
1044 a novel phylum. ISME J. 2016;10: 2801–2816. doi:10.1038/ismej.2016.84
- 1045 60. Henderson G, Cox F, Kittelmann S, Miri VH, Zethof M, Noel SJ, et al. Effect of DNA  
1046 extraction methods and sampling techniques on the apparent structure of cow and sheep  
1047 rumen microbial communities. PLoS One. 2013;8: 1–14.  
1048 doi:10.1371/journal.pone.0074787
- 1049 61. De Menezes AB, Lewis E, O'Donovan M, O'Neill BF, Clipson N, Doyle EM.  
1050 Microbiome analysis of dairy cows fed pasture or total mixed ration diets. FEMS  
1051 Microbiol Ecol. 2011;78: 256–265. doi:10.1111/j.1574-6941.2011.01151.x
- 1052 62. Flint HJ. The rumen microbial ecosystem—some recent developments. Trends Microbiol.  
1053 1997;5: 483–488. doi:10.1016/S0966-842X(97)01159-1
- 1054 63. Hungate RE. The Rumen Microbial Ecosystem. Annual Review of Ecology and  
1055 Systematics. 1975. doi:10.1146/annurev.es.06.110175.000351

- 1056 64. Dehority BA, Scott HW. Extent of Cellulose and Hemicellulose Digestion in Various  
1057 Forages by Pure Cultures of Rumen Bacteria. *J Dairy Sci.* 1967;50: 1136–1141.  
1058 doi:10.3168/jds.S0022-0302(67)87579-9
- 1059 65. Shinkai T, Kobayashi Y. Localization of ruminal cellulolytic bacteria on plant fibrous  
1060 materials as determined by fluorescence in situ hybridization and real-time PCR. *Appl*  
1061 *Environ Microbiol.* 2007;73: 1646–1652. doi:10.1128/AEM.01896-06
- 1062 66. Polan CE, Cummins KA, Sniffen CJ, Muscato T V., Vicini JL, Crooker BA, et al.  
1063 Responses of dairy cows to supplemental rumen-protected forms of methionine and  
1064 lysine. *J Dairy Sci.* 1991;74: 2997–3013. doi:10.3168/jds.S0022-0302(91)78486-5
- 1065 67. Russell JB. Factors affecting lysine degradation by ruminal fusobacteria. *FEMS Microbiol*  
1066 *Ecol.* 2006;56: 18–24. doi:10.1111/j.1574-6941.2006.00041.x
- 1067 68. Tadepalli S, Narayanan SK, Stewart GC, Chengappa MM, Nagaraja TG. *Fusobacterium*  
1068 *necrophorum*: A ruminal bacterium that invades liver to cause abscesses in cattle.  
1069 *Anaerobe.* 2009;15: 36–43. doi:10.1016/j.anaerobe.2008.05.005
- 1070 69. Nagaraja TG, Chengappa MM. Liver abscesses in feedlot cattle: a review. *J Anim Sci.*  
1071 1998;76: 287–298. doi:10.2527/1998.761287x
- 1072 70. Noel SJ, Olijhoek DW, McLean F, Løvendahl P, Lund P, Højberg O. Rumen and fecal  
1073 microbial community structure of holstein and Jersey dairy cows as affected by breed,  
1074 diet, and residual feed intake. *Animals.* 2019;9. doi:10.3390/ani9080498
- 1075 71. Zhao L, Li X, Atwill ER, Aly S, Williams DR. Dynamic changes in fecal bacterial  
1076 microbiota of dairy cattle across the production line. *bioRxiv.* 2020; 1–25.  
1077 doi:10.1101/2020.02.21.960500
- 1078 72. Biddle A, Stewart L, Blanchard J, Leschine S. Untangling the genetic basis of fibrolytic

- 1079 specialization by lachnospiraceae and ruminococcaceae in diverse gut communities.  
1080 Diversity. 2013;5: 627–640. doi:10.3390/d5030627
- 1081 73. Haas KN. Expansion of and reclassification within the family Lachnospiraceae. University  
1082 of Massachusetts Amherst. 2016.
- 1083 74. Meehan CJ, Beiko RG. A phylogenomic view of ecological specialization in the  
1084 lachnospiraceae, a family of digestive tract-associated bacteria. Genome Biol Evol.  
1085 2014;6: 703–713. doi:10.1093/gbe/evu050
- 1086 75. Ouwerkerk JP, Aalvink S, Belzer C, de Vos WM. Akkermansia glycaniphila sp. nov., an  
1087 anaerobic mucin-degrading bacterium isolated from reticulated python faeces. Int J Syst  
1088 Evol Microbiol. 2016;66: 4614–4620. doi:10.1099/ijsem.0.001399
- 1089 76. Derrien M, Vaughan EE, Plugge CM, de Vos WM. Akkermansia muciniphila gen. nov.,  
1090 sp. nov., a human intestinal mucin-degrading bacterium. Int J Syst Evol Microbiol.  
1091 2004;54: 1469–1476. doi:10.1099/ijms.0.02873-0
- 1092 77. Collado MC, Derrien M, Isolauri E, De Vos WM, Salminen S. Intestinal integrity and  
1093 Akkermansia muciniphila, a mucin-degrading member of the intestinal microbiota present  
1094 in infants, adults, and the elderly. Appl Environ Microbiol. 2007;73: 7767–7770.  
1095 doi:10.1128/AEM.01477-07
- 1096 78. Derrien M, Collado MC, Ben-Amor K, Salminen S, De Vos WM. The mucin degrader  
1097 Akkermansia muciniphila is an abundant resident of the human intestinal tract. Appl  
1098 Environ Microbiol. 2008;74: 1646–1648. doi:10.1128/AEM.01226-07
- 1099 79. Callaway TR, Dowd SE, Edrington TS, Anderson RC, Krueger N, Bauer N, et al.  
1100 Evaluation of bacterial diversity in the rumen and feces of cattle fed different levels of  
1101 dried distillers grains plus solubles using bacterial tag-encoded FLX amplicon



- 1102 pyrosequencing. *J Anim Sci.* 2010;88: 3977–3983. doi:10.2527/jas.2010-2900
- 1103 80. Cani PD, de Vos WM. Next-generation beneficial microbes: The case of *Akkermansia*  
1104 *muciniphila*. *Front Microbiol.* 2017;8: 1–8. doi:10.3389/fmicb.2017.01765
- 1105 81. Xu Y, Wang N, Tan HY, Li S, Zhang C, Feng Y. Function of *Akkermansia muciniphila* in  
1106 obesity: Interactions with lipid metabolism, immune response and gut systems. *Front*  
1107 *Microbiol.* 2020;11: 1–12. doi:10.3389/fmicb.2020.00219
- 1108 82. Plovier H, Everard A, Druart C, Depommier C, Van Hul M, Geurts L, et al. A purified  
1109 membrane protein from *Akkermansia muciniphila* or the pasteurized bacterium improves  
1110 metabolism in obese and diabetic mice. *Nat Publ Gr.* 2016;23. doi:10.1038/nm.4236
- 1111 83. Ungerfeld EM. Metabolic Hydrogen Flows in Rumen Fermentation: Principles and  
1112 Possibilities of Interventions. *Front Microbiol.* 2020;11. doi:10.3389/fmicb.2020.00589
- 1113 84. Janssen PH. Influence of hydrogen on rumen methane formation and fermentation  
1114 balances through microbial growth kinetics and fermentation thermodynamics. *Anim Feed*  
1115 *Sci Technol.* 2010;160: 1–22. doi:10.1016/j.anifeedsci.2010.07.002
- 1116 85. Johnson KA, Johnson DE. Methane emissions from cattle. *J Anim Sci.* 1995;73: 2483–  
1117 2492. doi:10.2527/1995.7382483x
- 1118 86. Aguinaga Casañas MA, Rangkasenee N, Krattenmacher N, Thaller G, Metges CC, Kuhla  
1119 B. Methyl-coenzyme M reductase A as an indicator to estimate methane production from  
1120 dairy cows. *J Dairy Sci.* 2015;98: 4074–4083. doi:10.3168/jds.2015-9310
- 1121 87. Luton PE, Wayne JM, Sharp RJ, Riley PW. The *mcrA* gene as an alternative to 16S rRNA  
1122 in the phylogenetic analysis of methanogen populations in landfill. *Microbiology.*  
1123 2002;148: 3521–3530. doi:10.1099/00221287-148-11-3521
- 1124 88. Friedrich MW. Methyl-coenzyme M reductase genes: Unique functional markers for

- 1125           methanogenic and anaerobic methane-oxidizing Archaea. *Methods Enzymol.* 2005;397:  
1126           428–442. doi:10.1016/S0076-6879(05)97026-2
- 1127   89.   Ozbayram E, Ince O, Ince B, Harms H, Kleinstuber S. Comparison of rumen and manure  
1128           microbiomes and implications for the inoculation of anaerobic digesters. *Microorganisms.*  
1129           2018;6: 15. doi:10.3390/microorganisms6010015
- 1130   90.   Lang K, Schuldes J, Klingl A, Poehlein A, Daniel R, Brune A. New mode of energy  
1131           metabolism in the seventh order of methanogens as revealed by comparative genome  
1132           analysis of “*Candidatus Methanoplasma termitum*.” *Appl Environ Microbiol.* 2015;81:  
1133           1338–1352. doi:10.1128/AEM.03389-14
- 1134   91.   Fournier GP, Gogarten JP. Evolution of acetoclastic methanogenesis in *Methanosarcina*  
1135           via horizontal gene transfer from cellulolytic *Clostridia*. *J Bacteriol.* 2008;190: 1124–  
1136           1127. doi:10.1128/JB.01382-07
- 1137

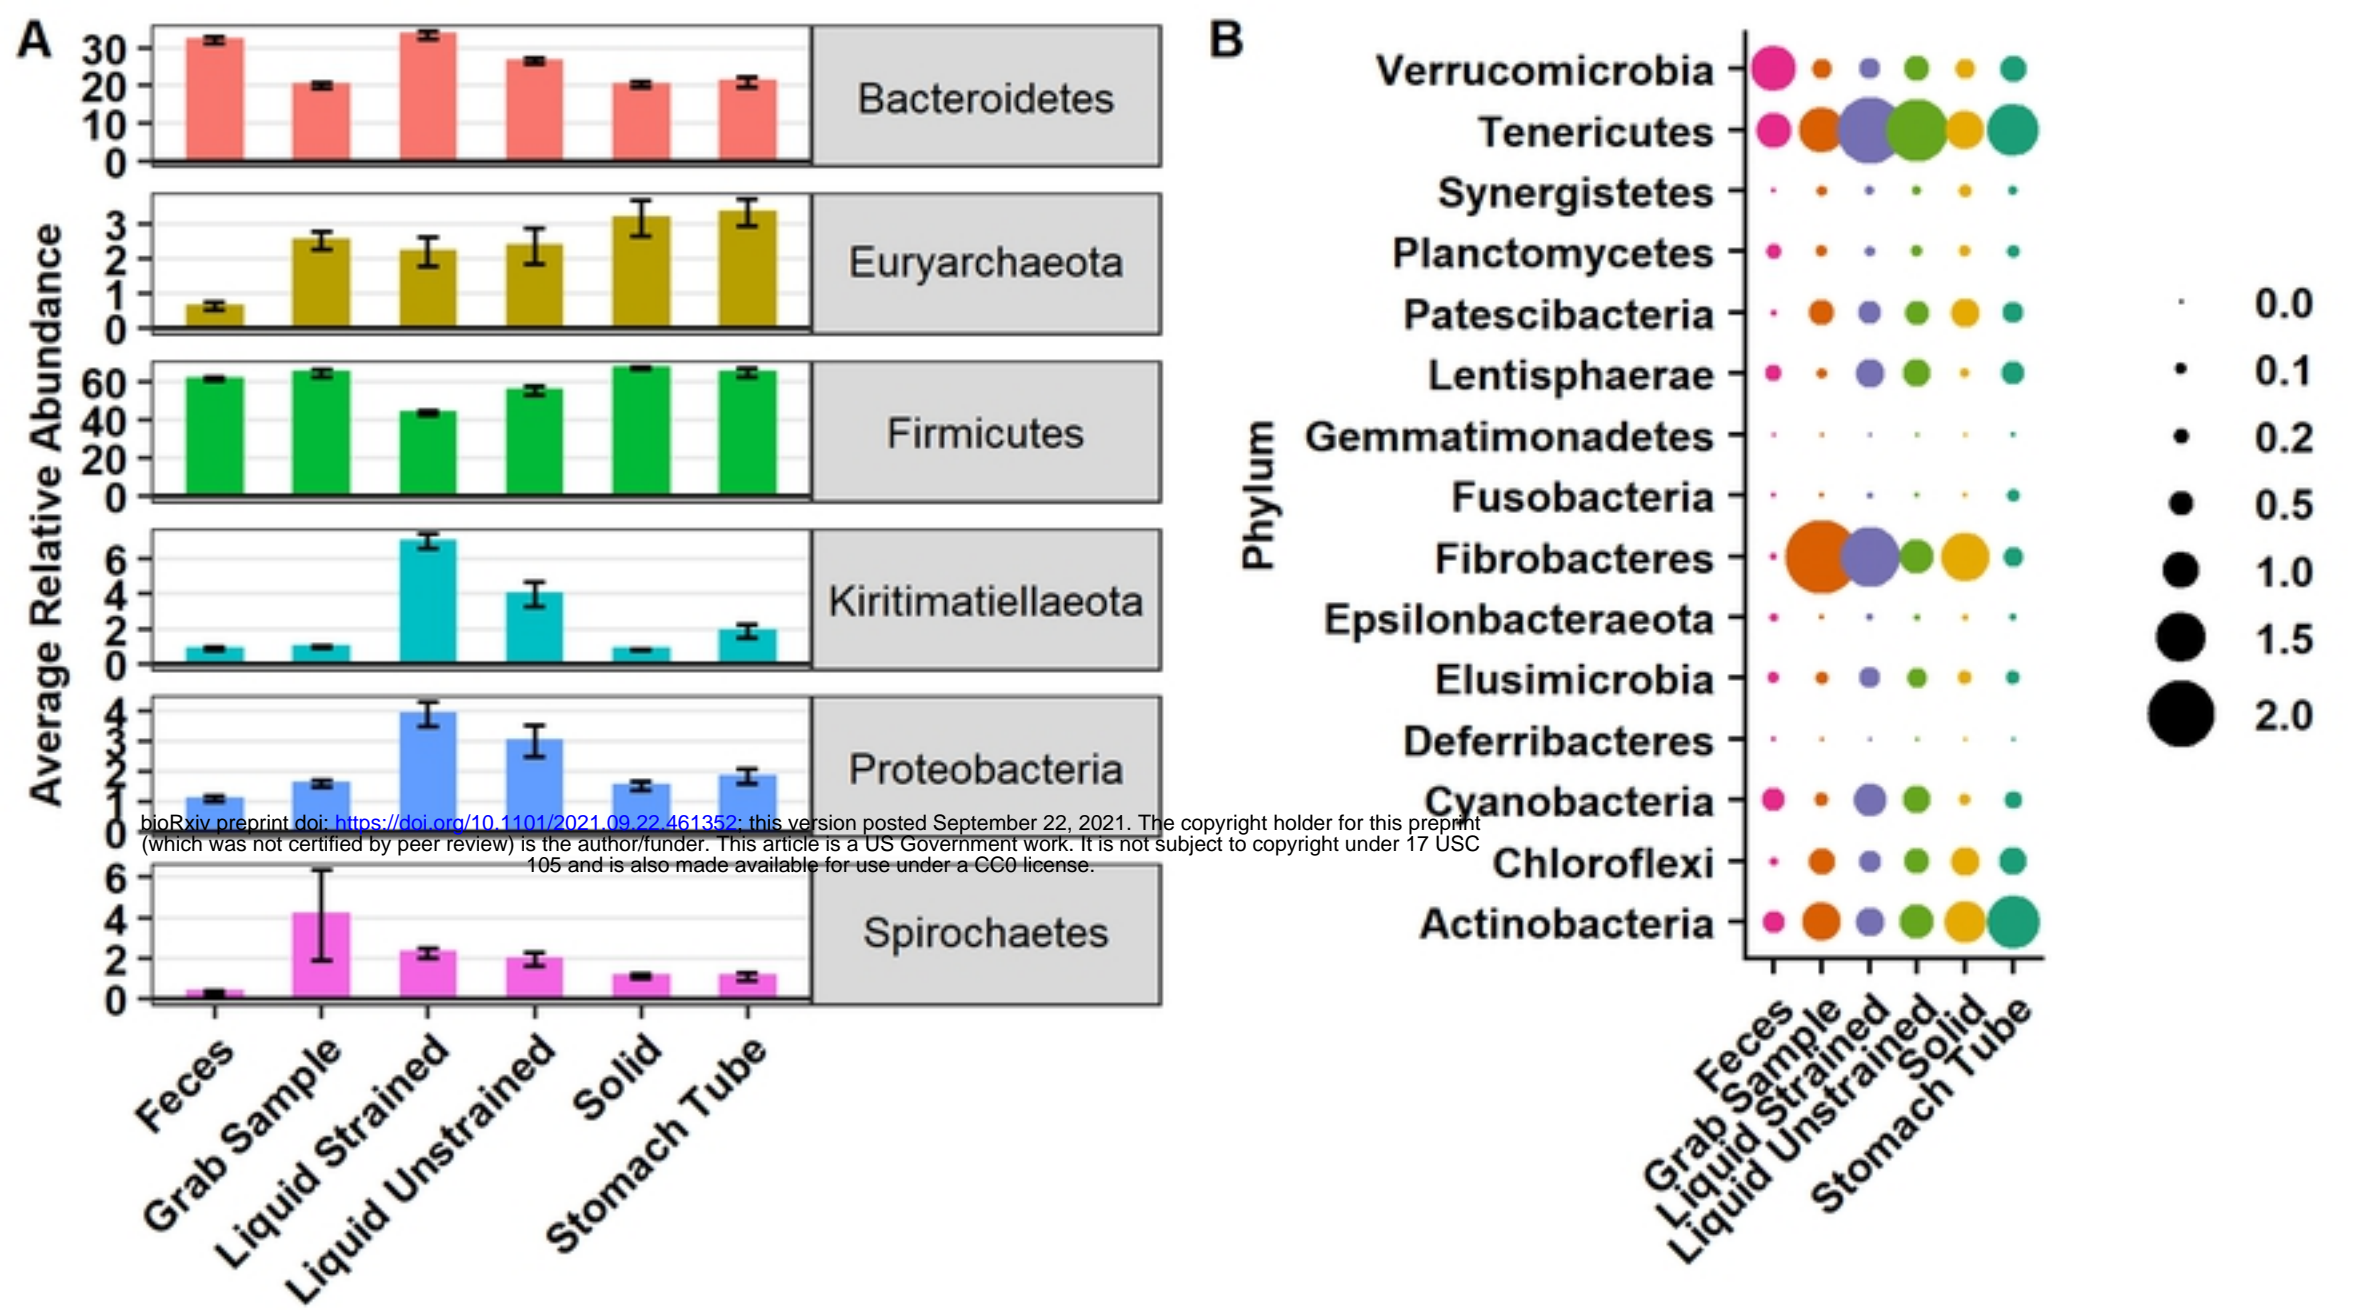

**C**

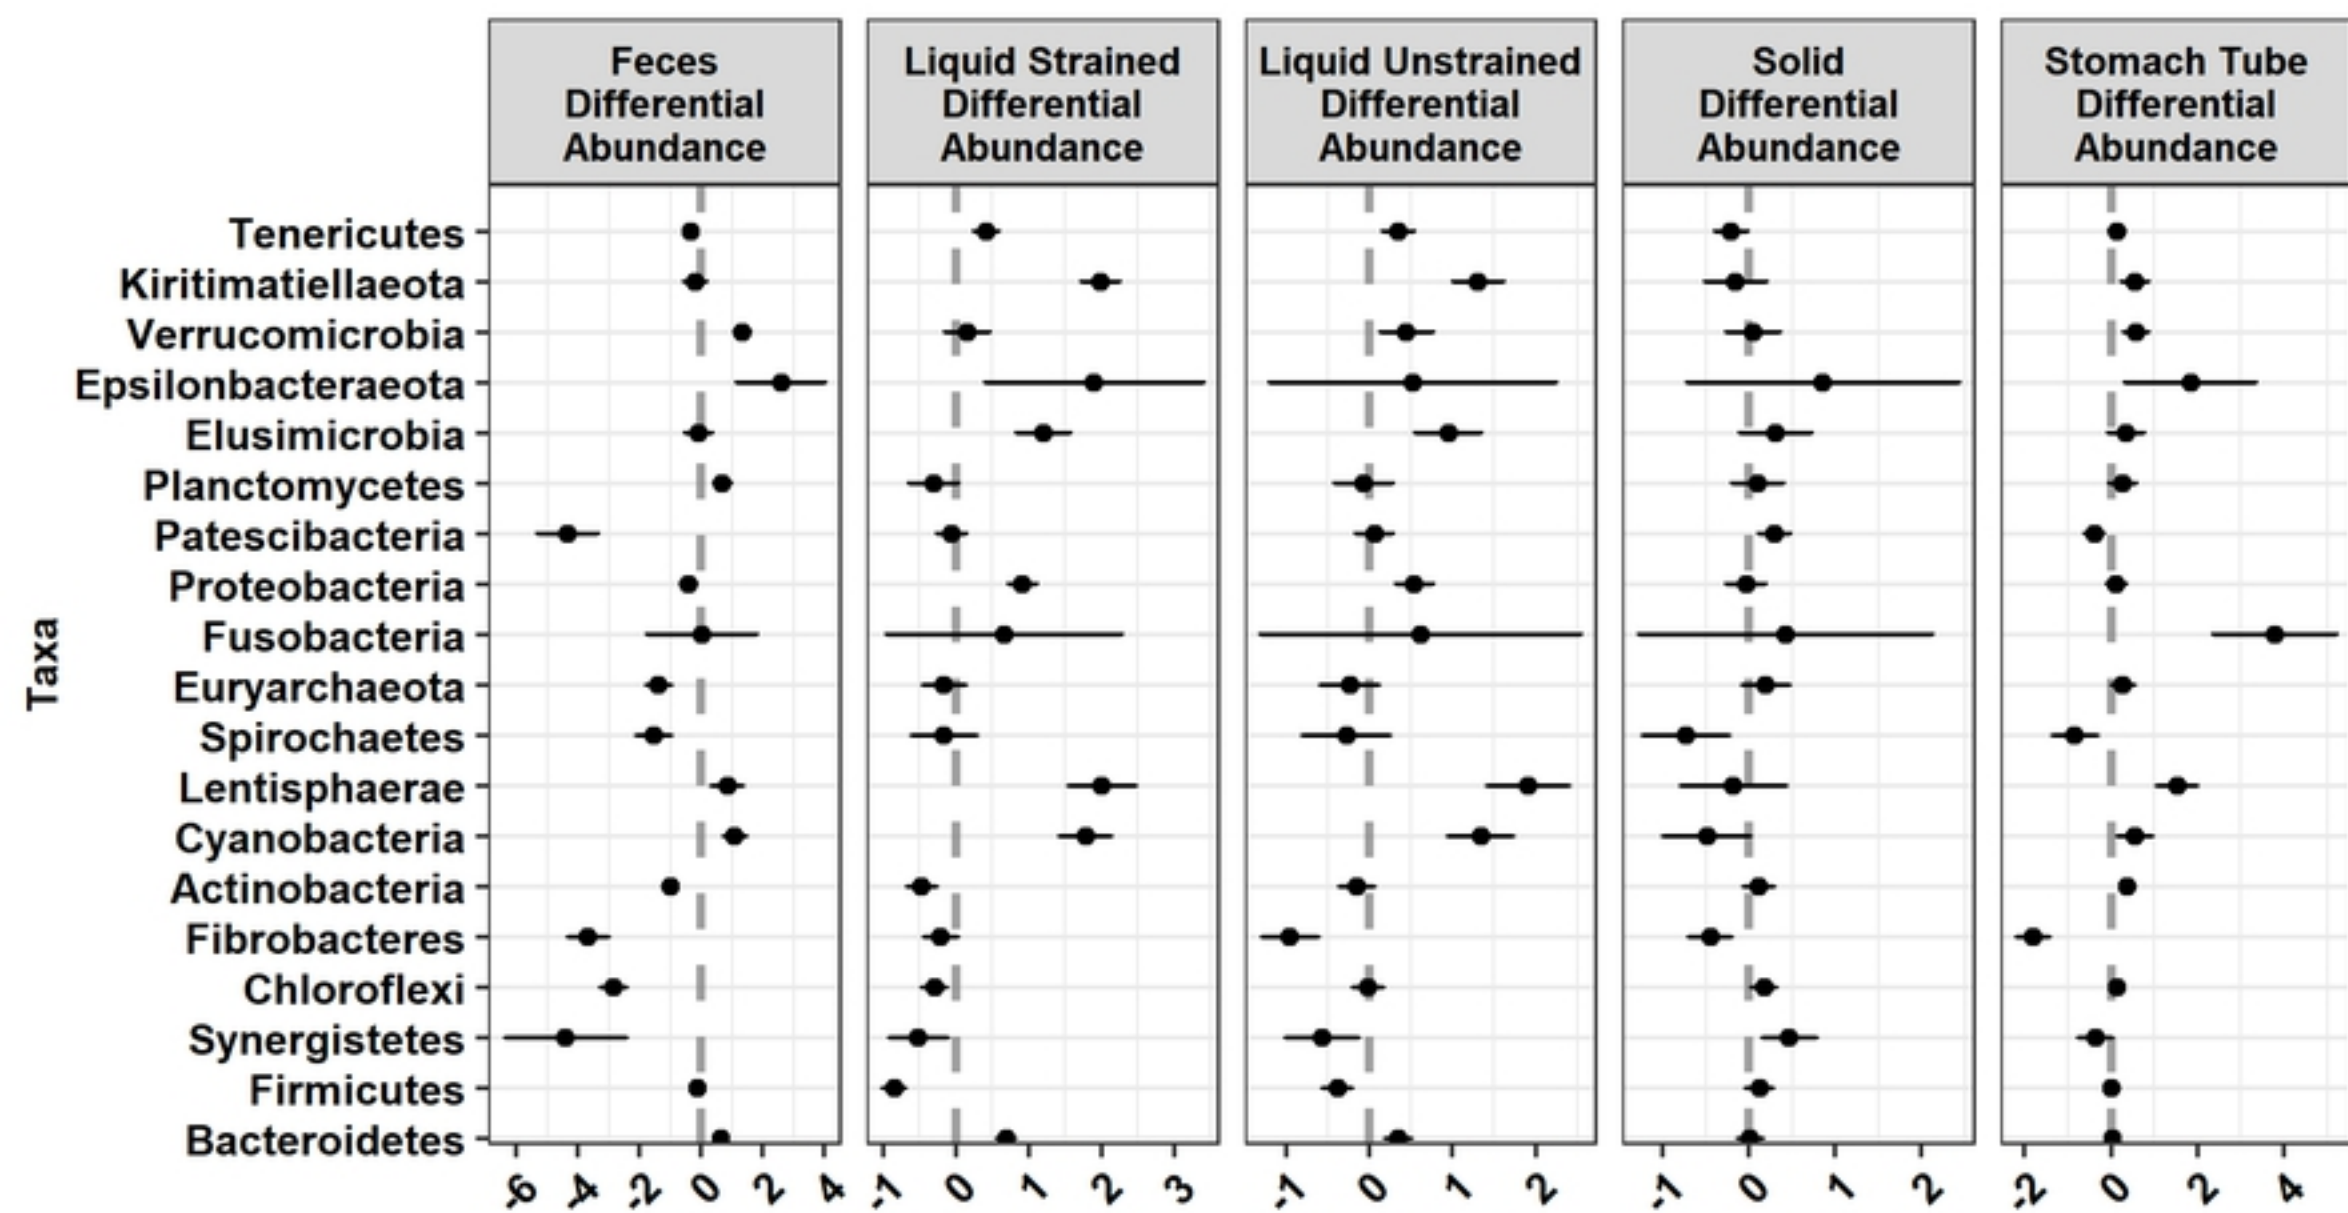

Fig 1

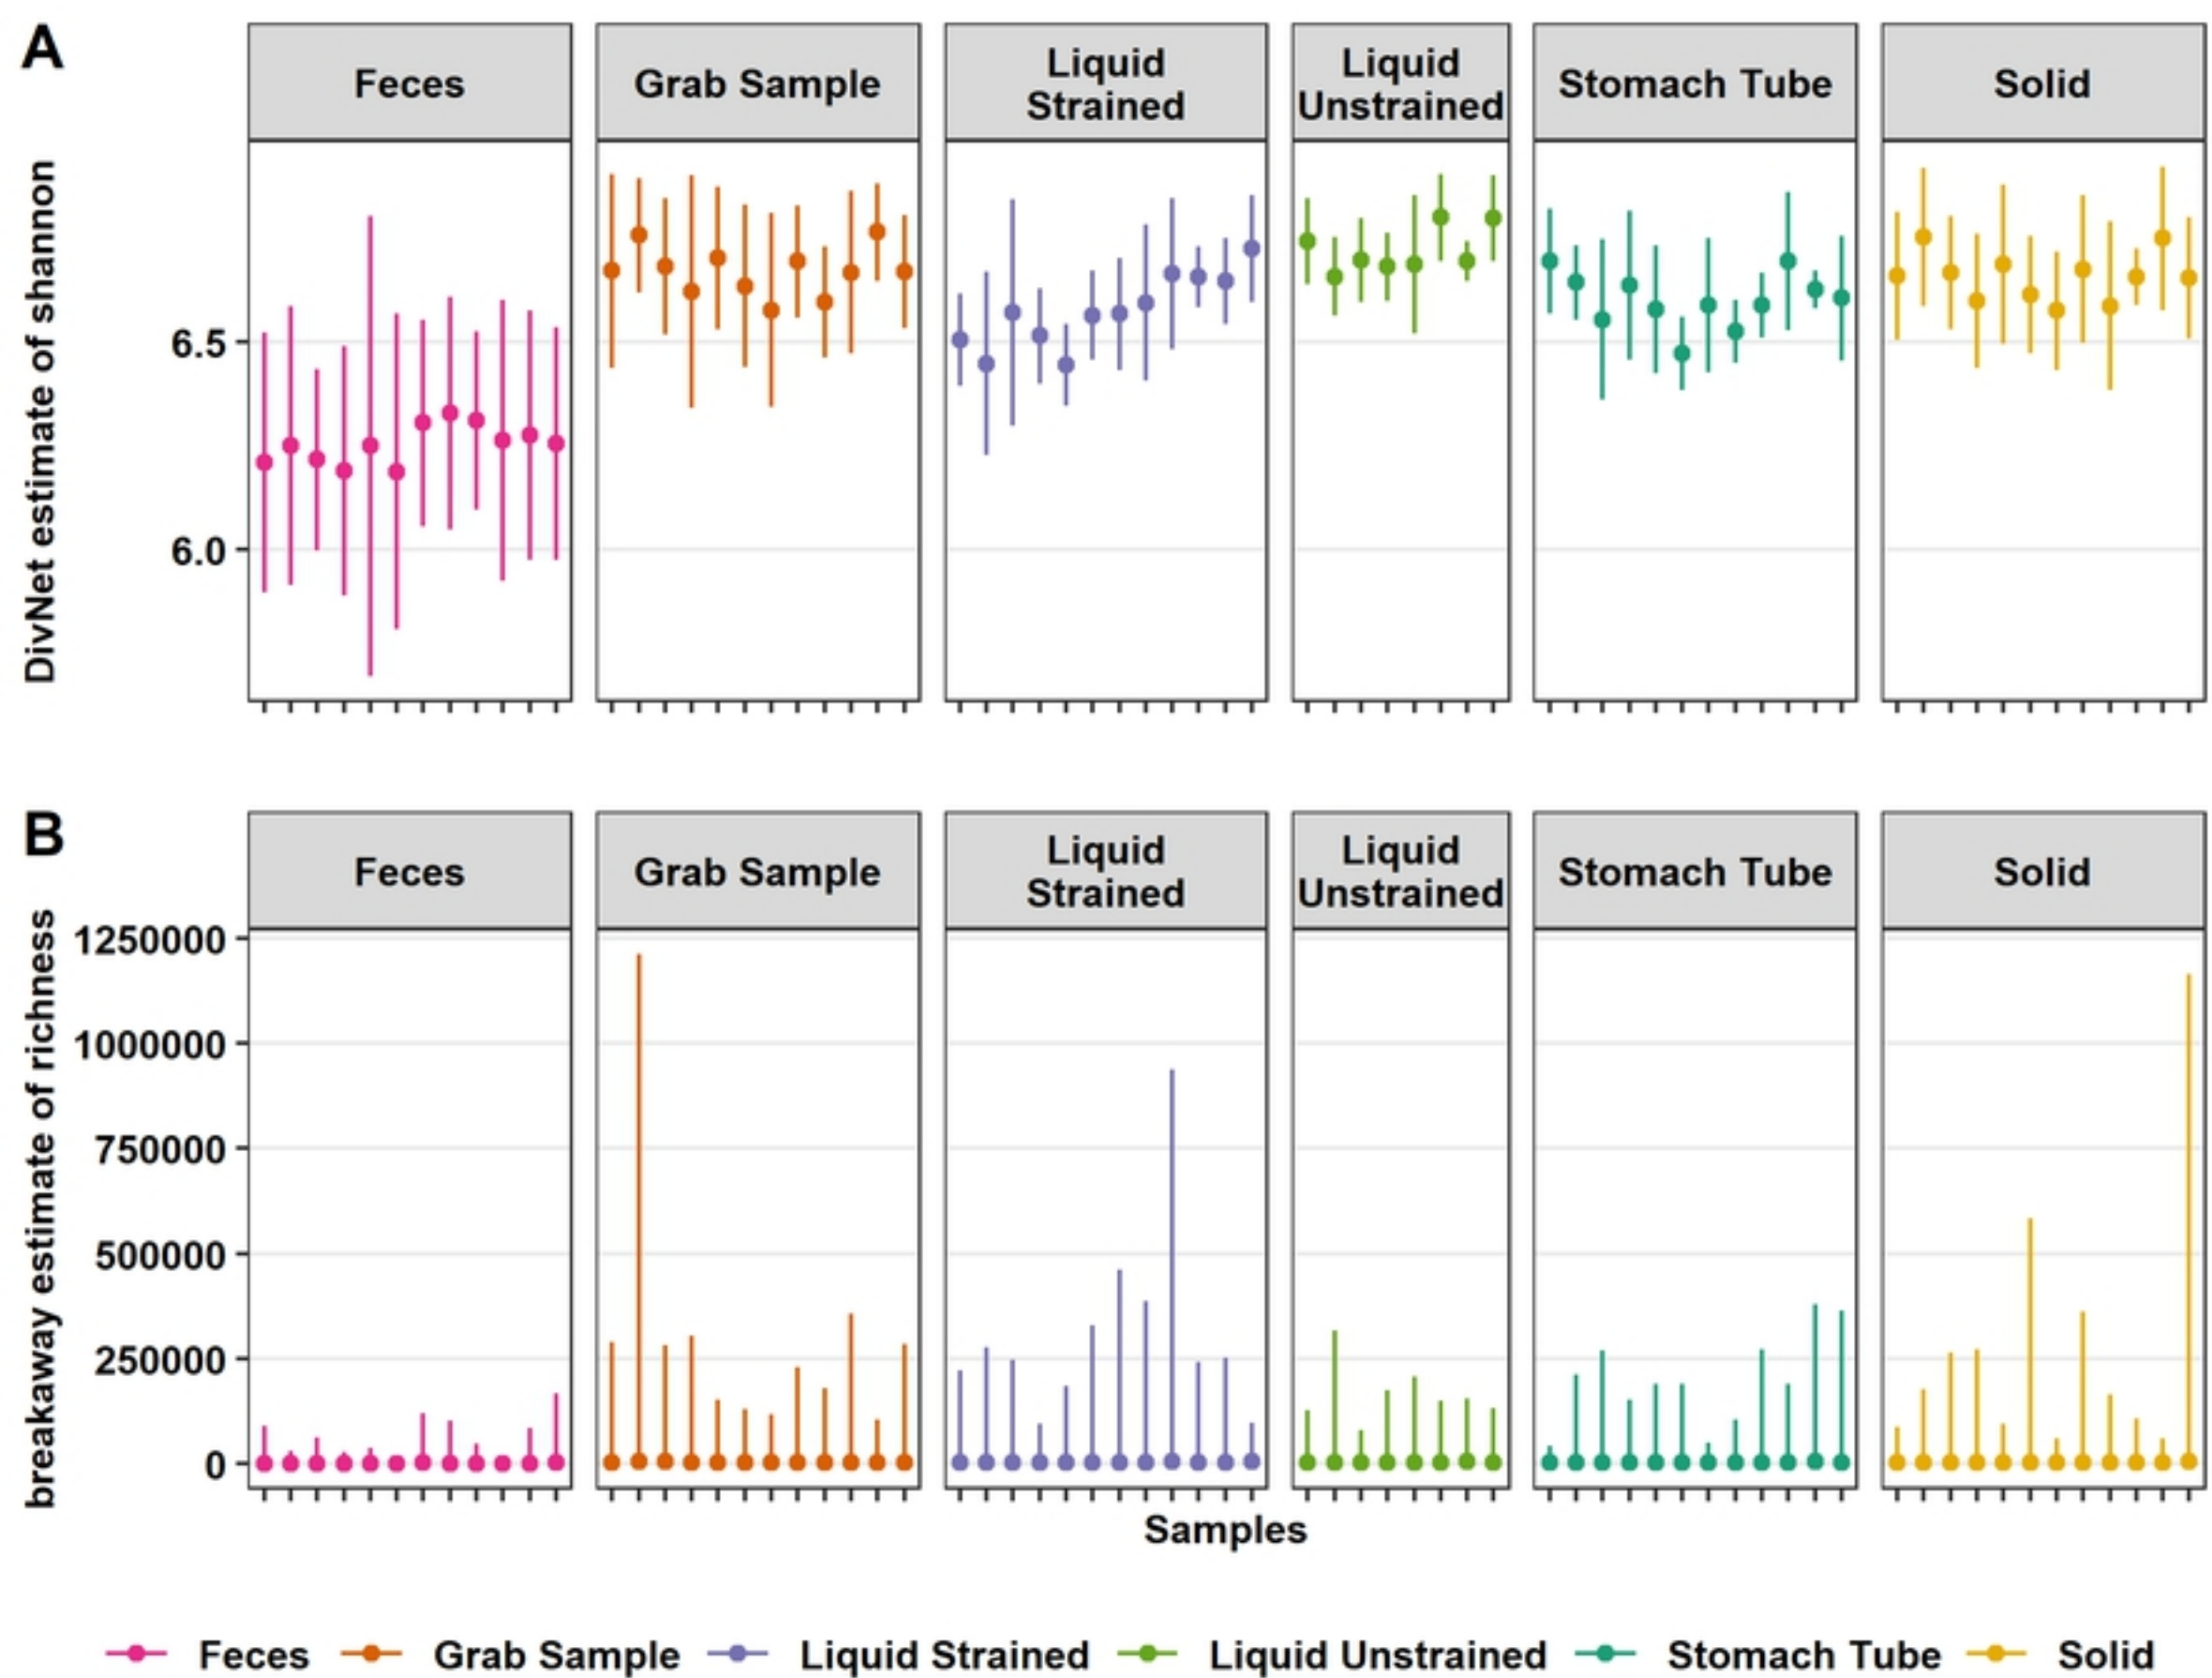

Fig 2

## Weighted Unifrac

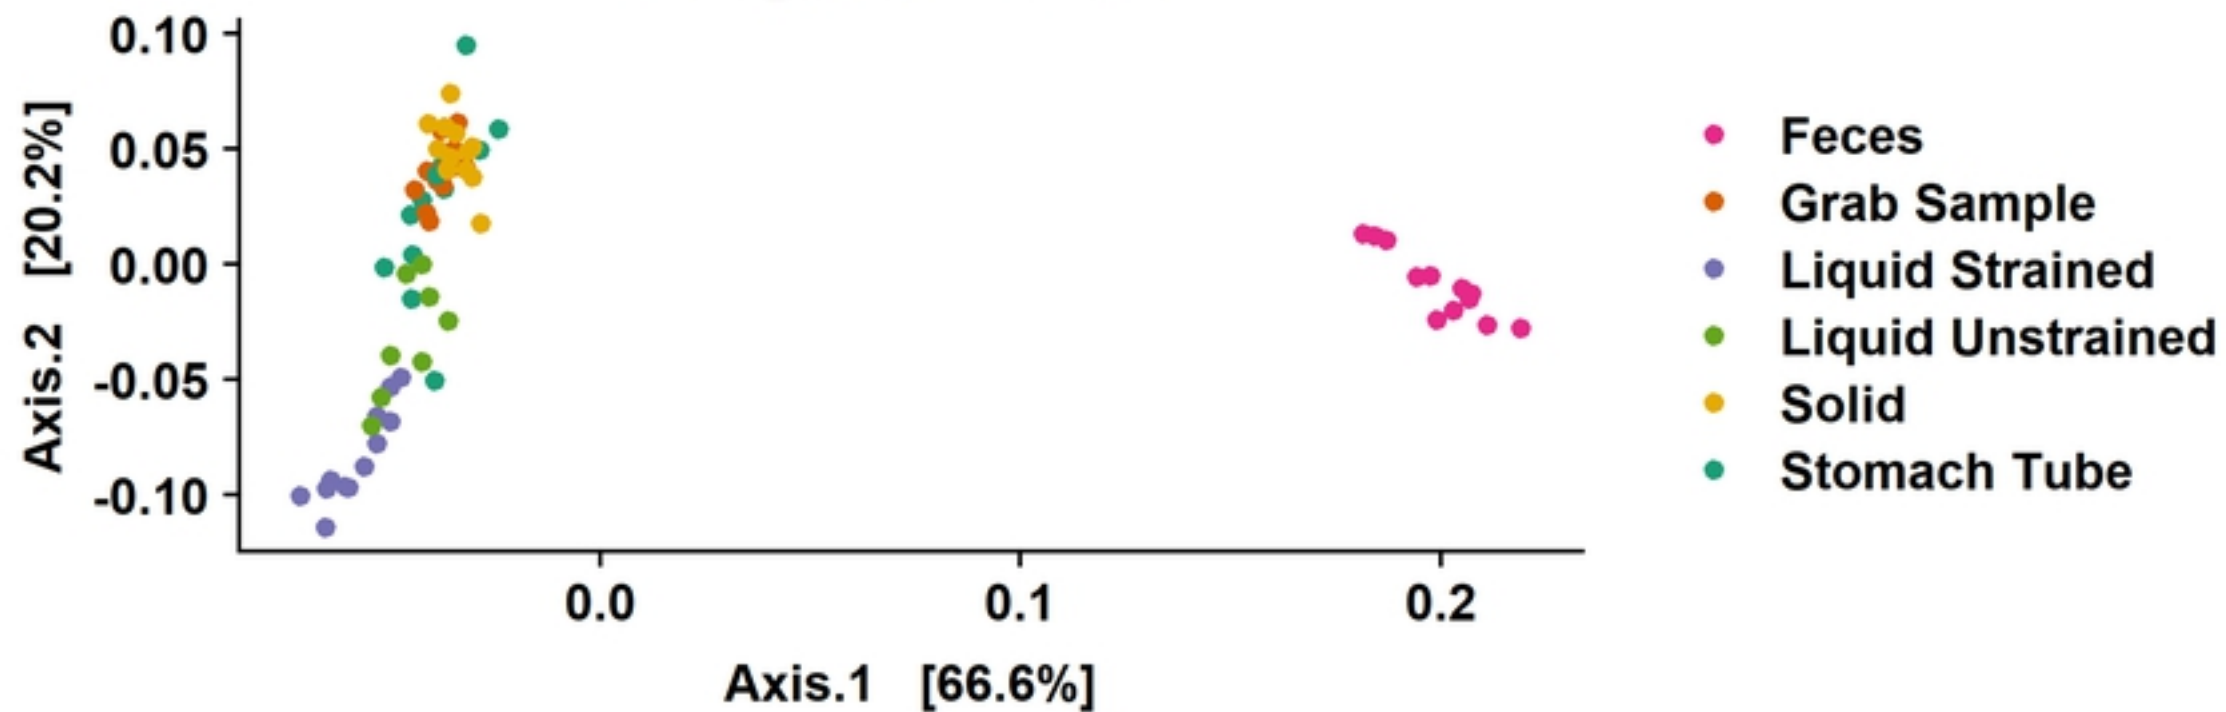

Fig 3

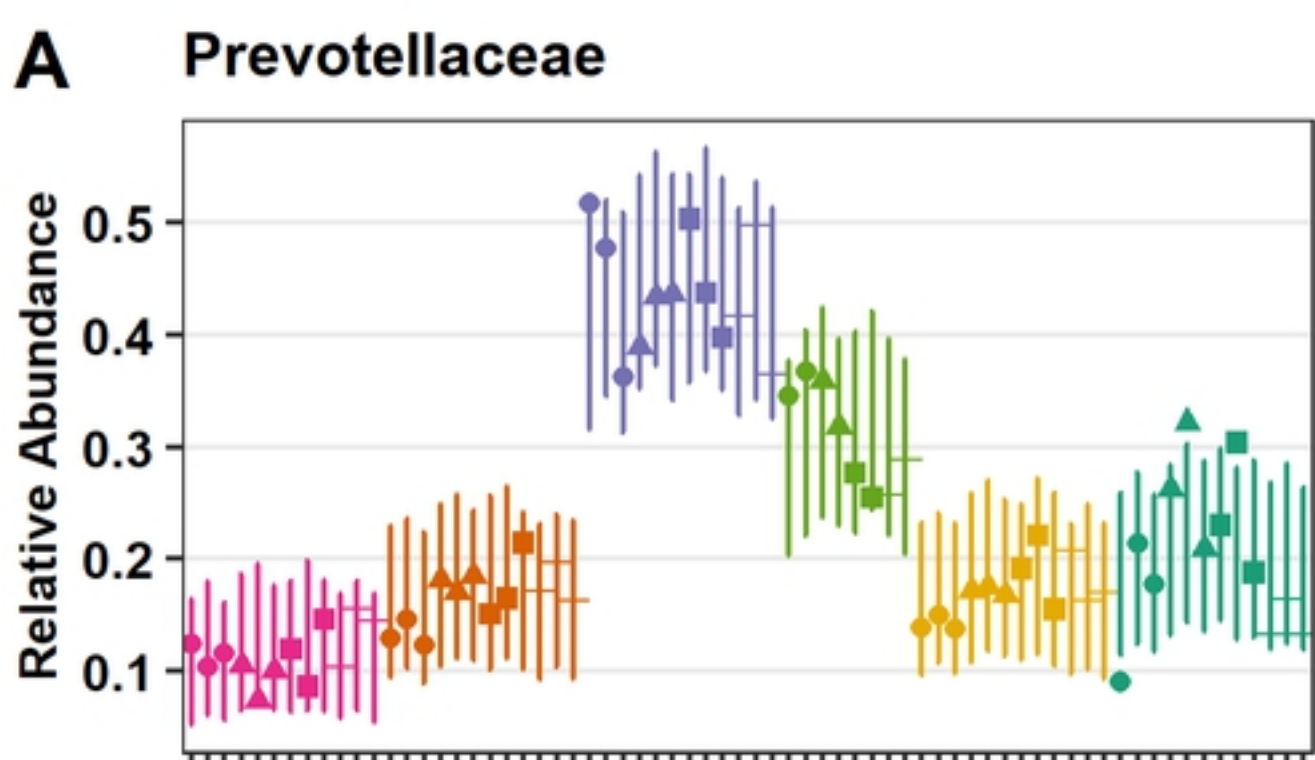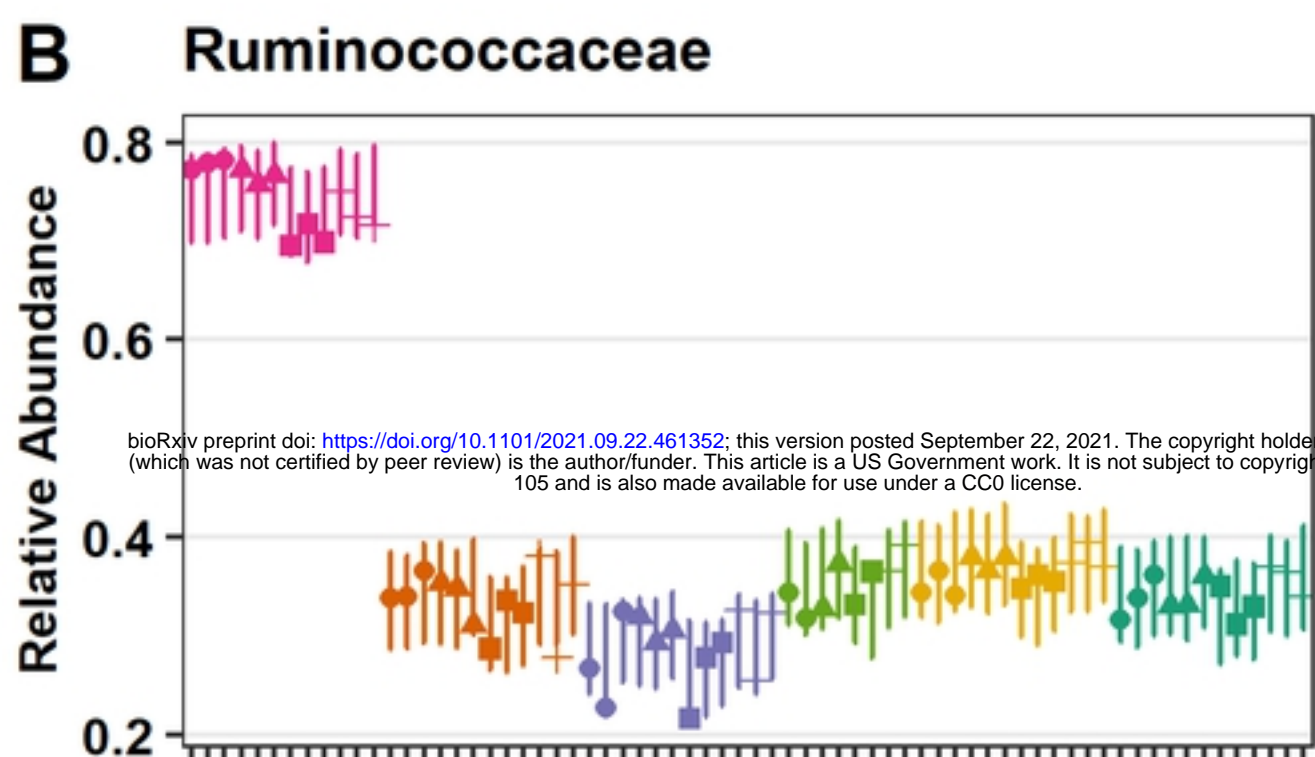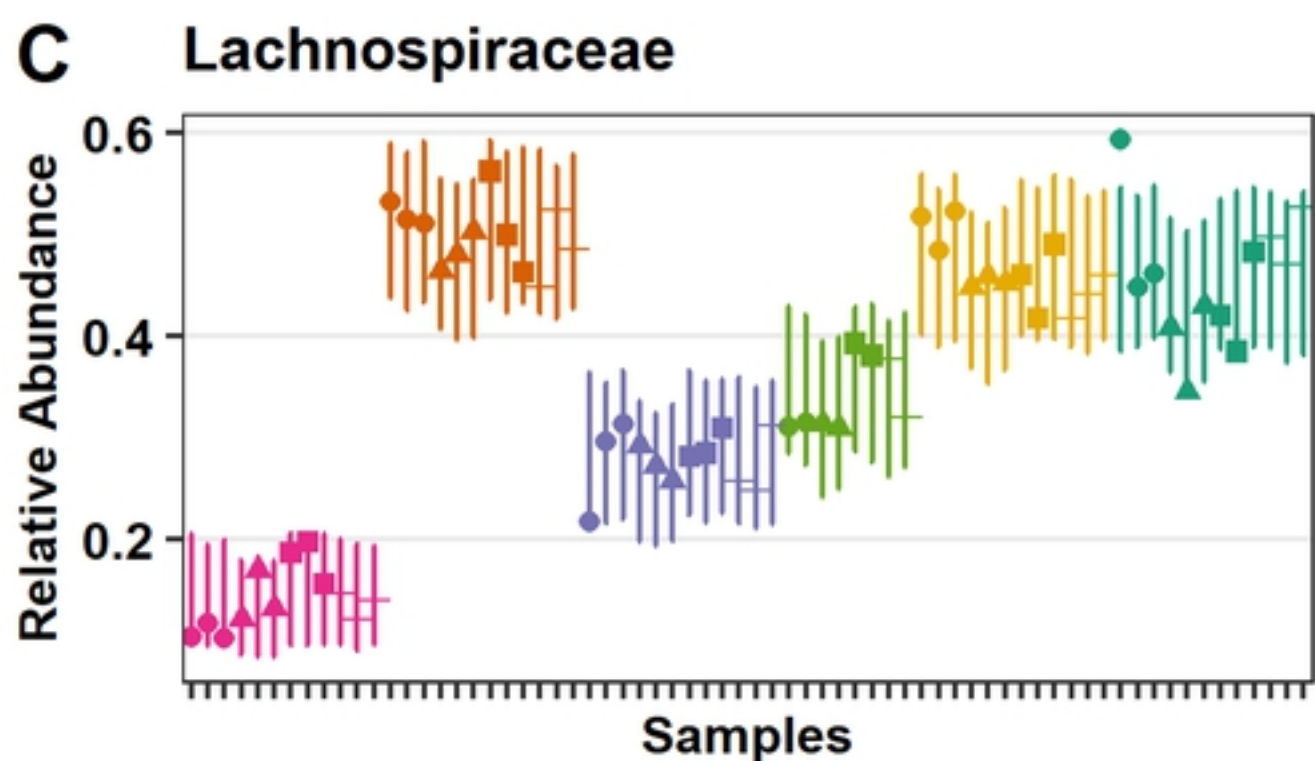

- Cow\_2372
- ▲ Cow\_2477
- Cow\_2549
- + Cow\_796

- Grab Sample
- Feces
- Stomach Tube
- Liquid Strained
- Liquid Unstrained
- Solid

Fig 5

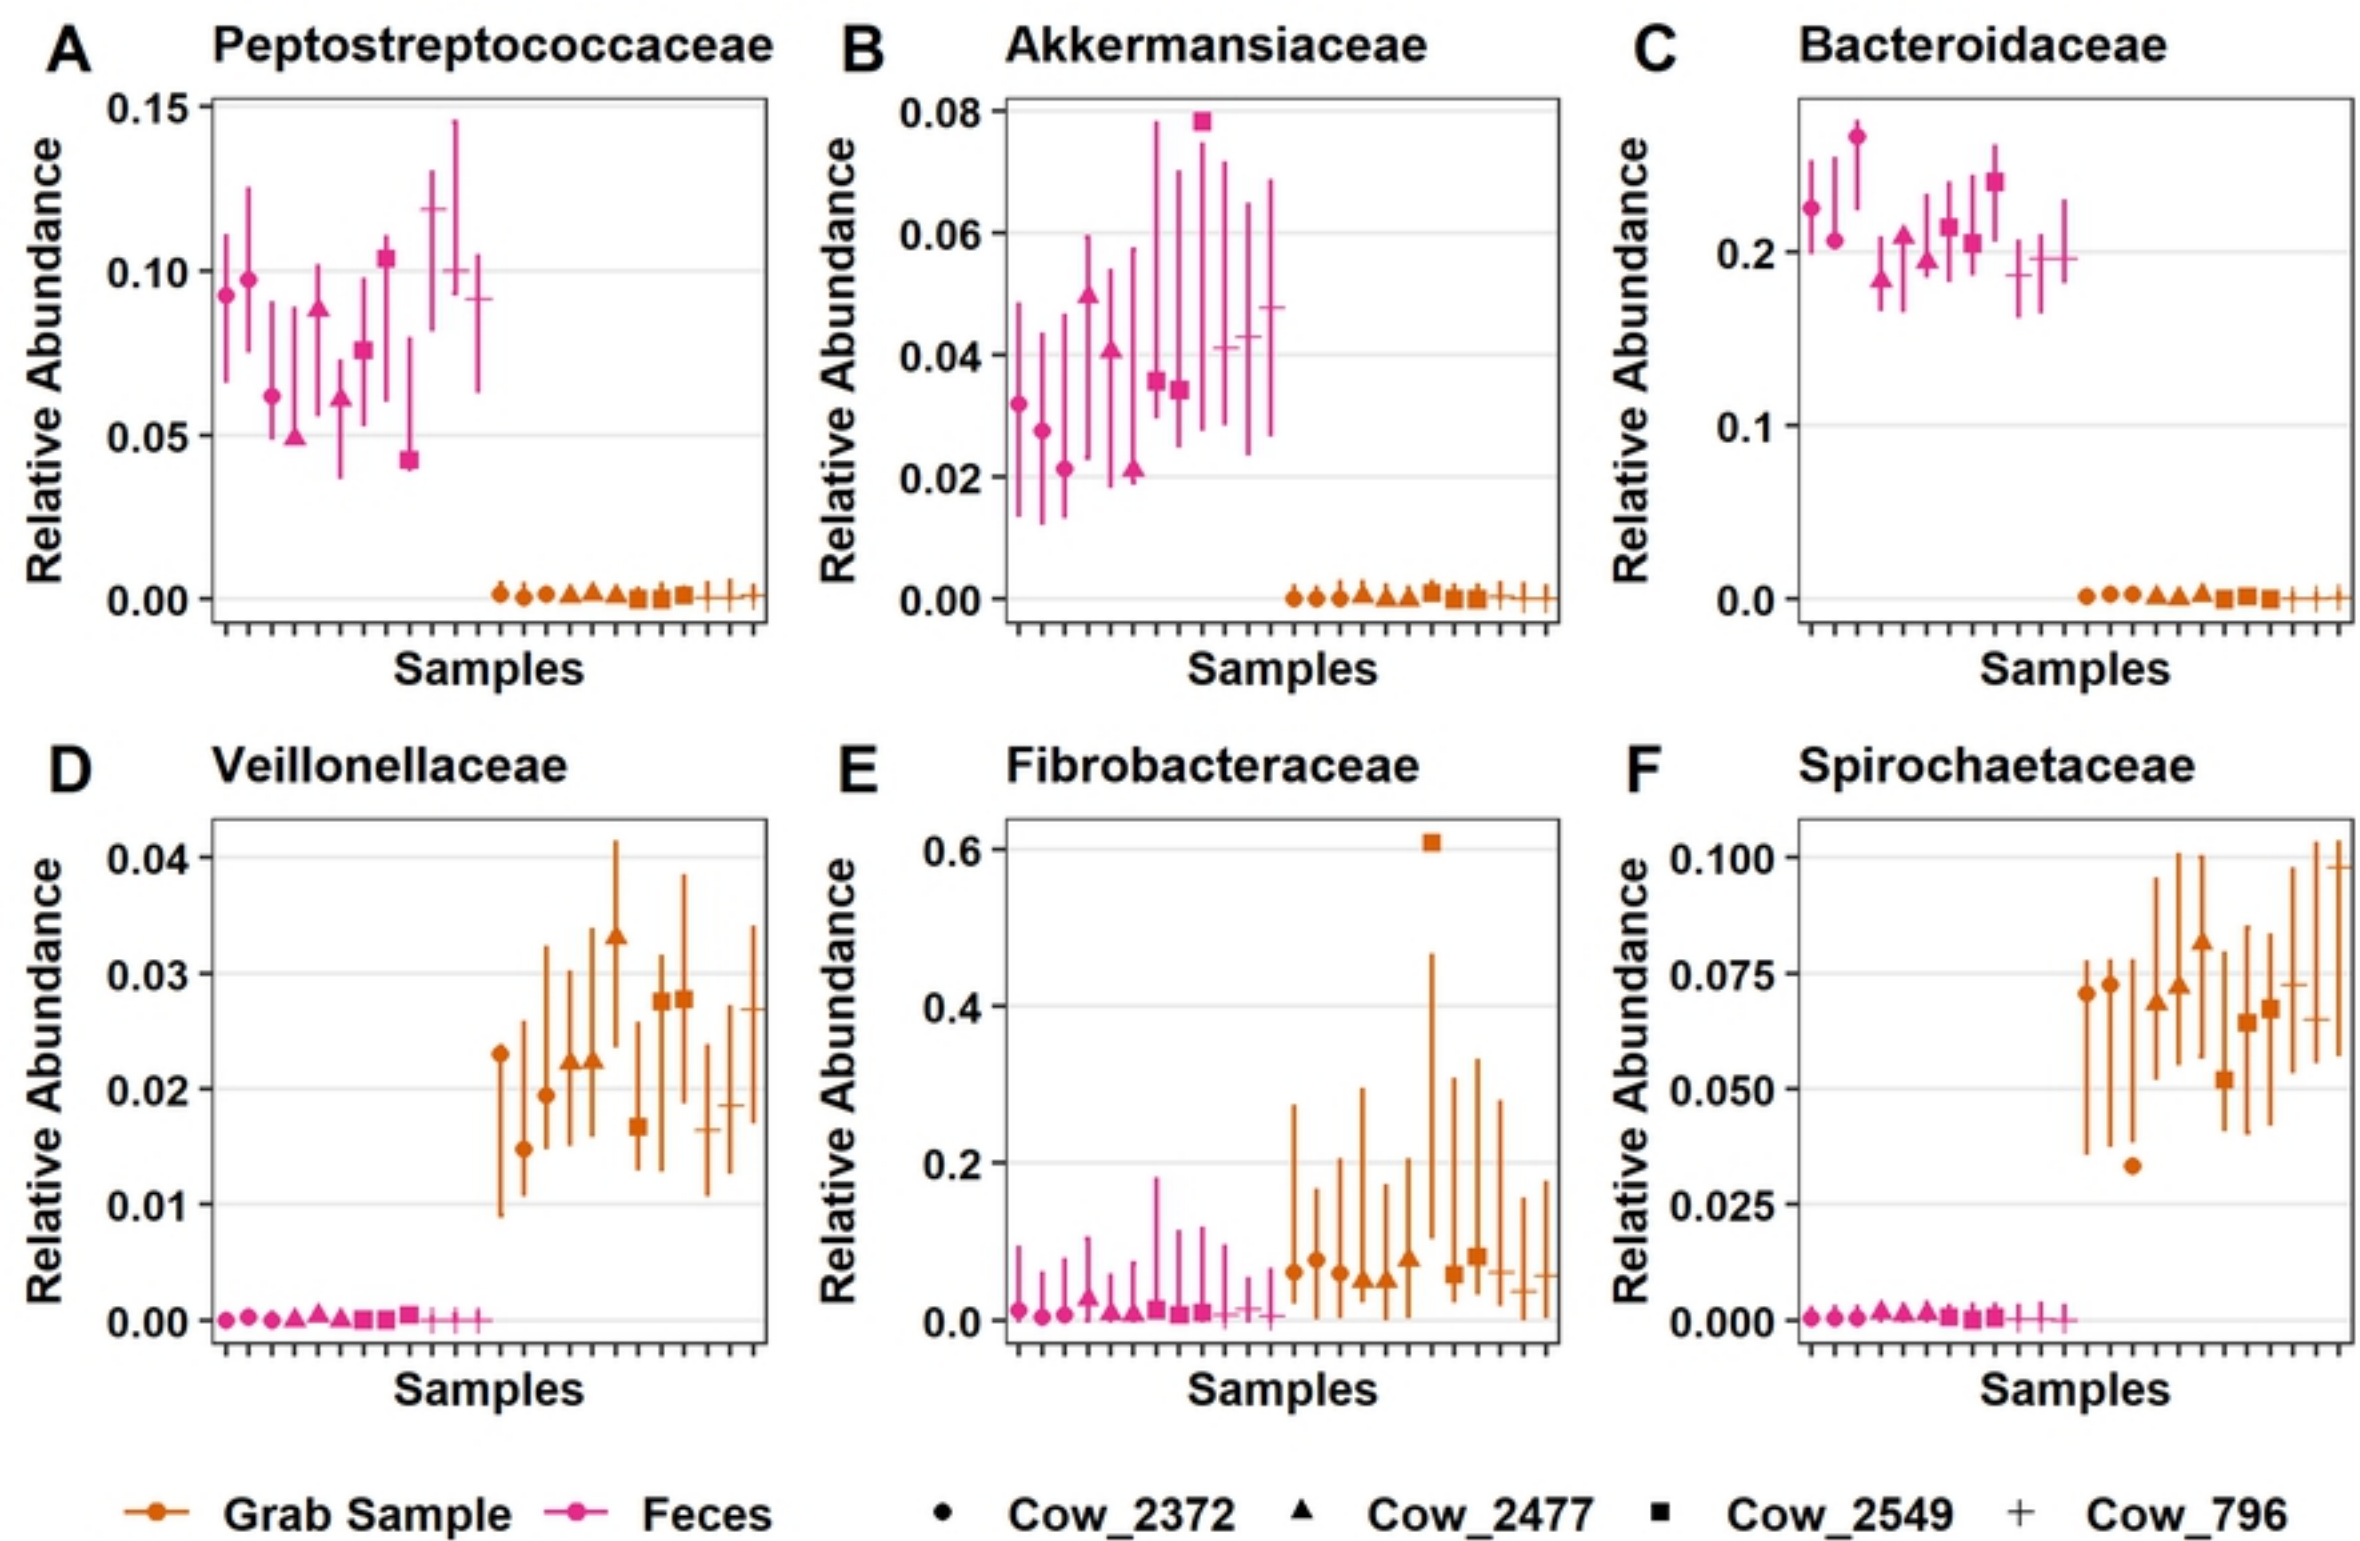

Fig 7

A

## DPCoA of Bray distance

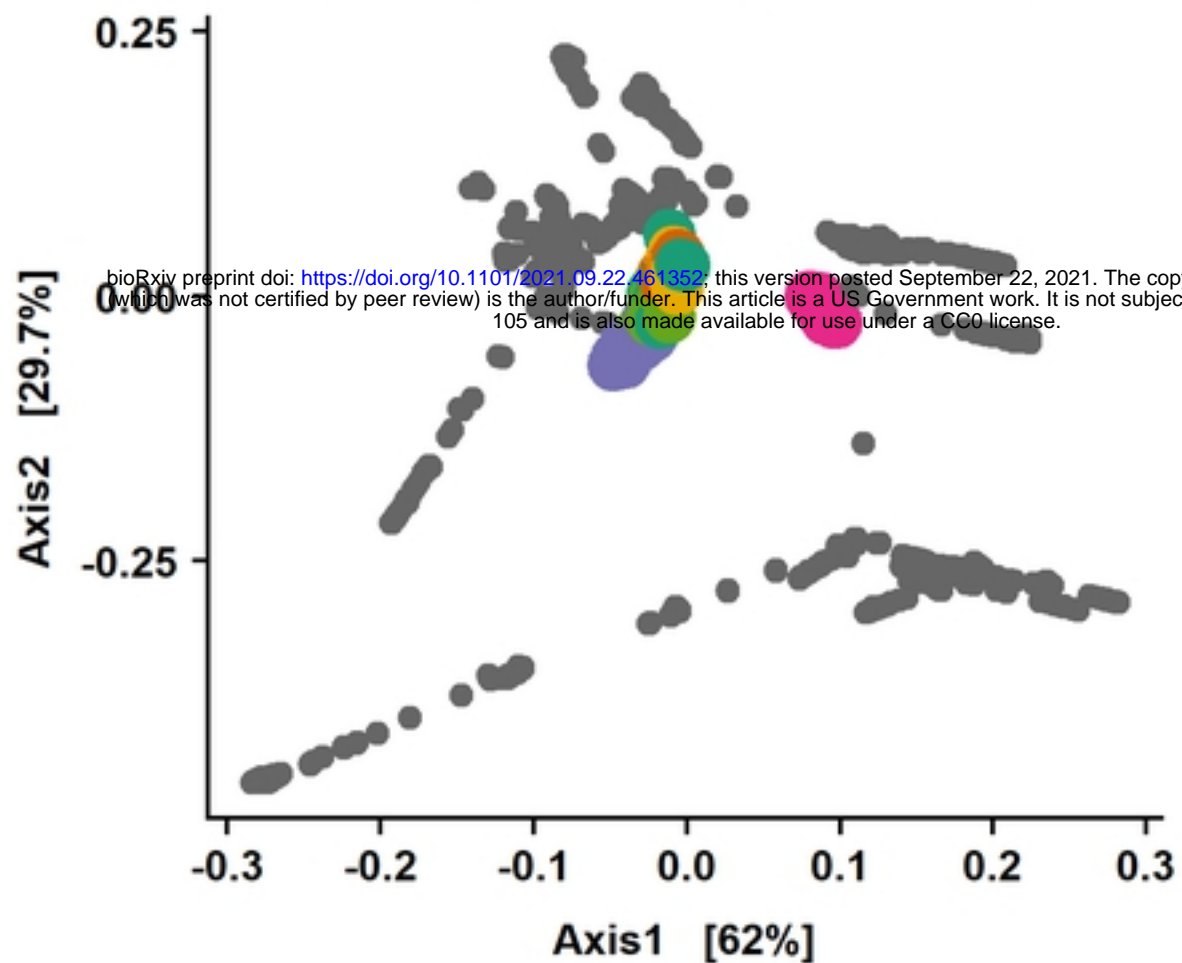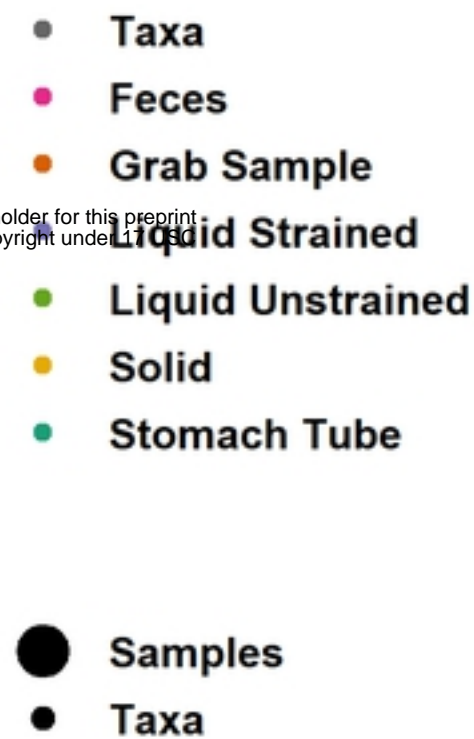

B

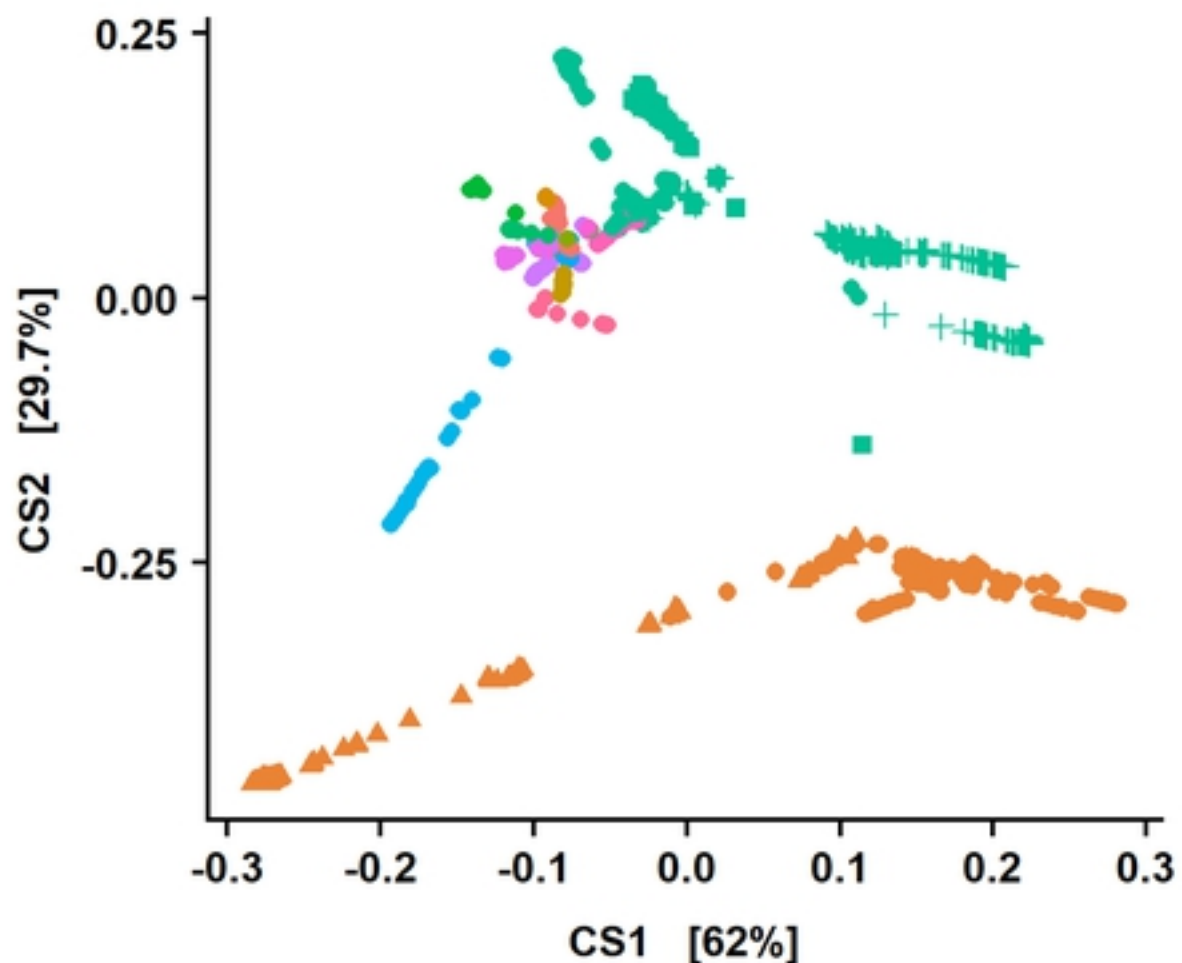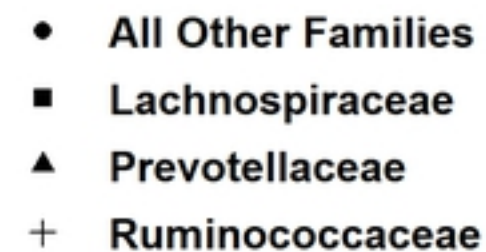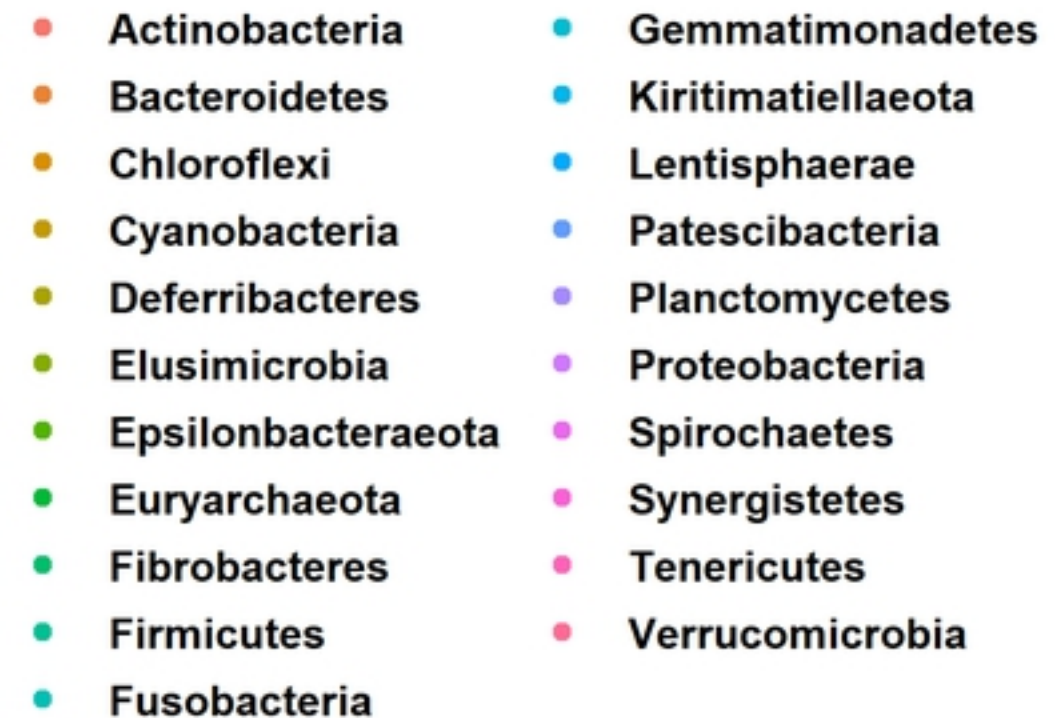

Fig 4



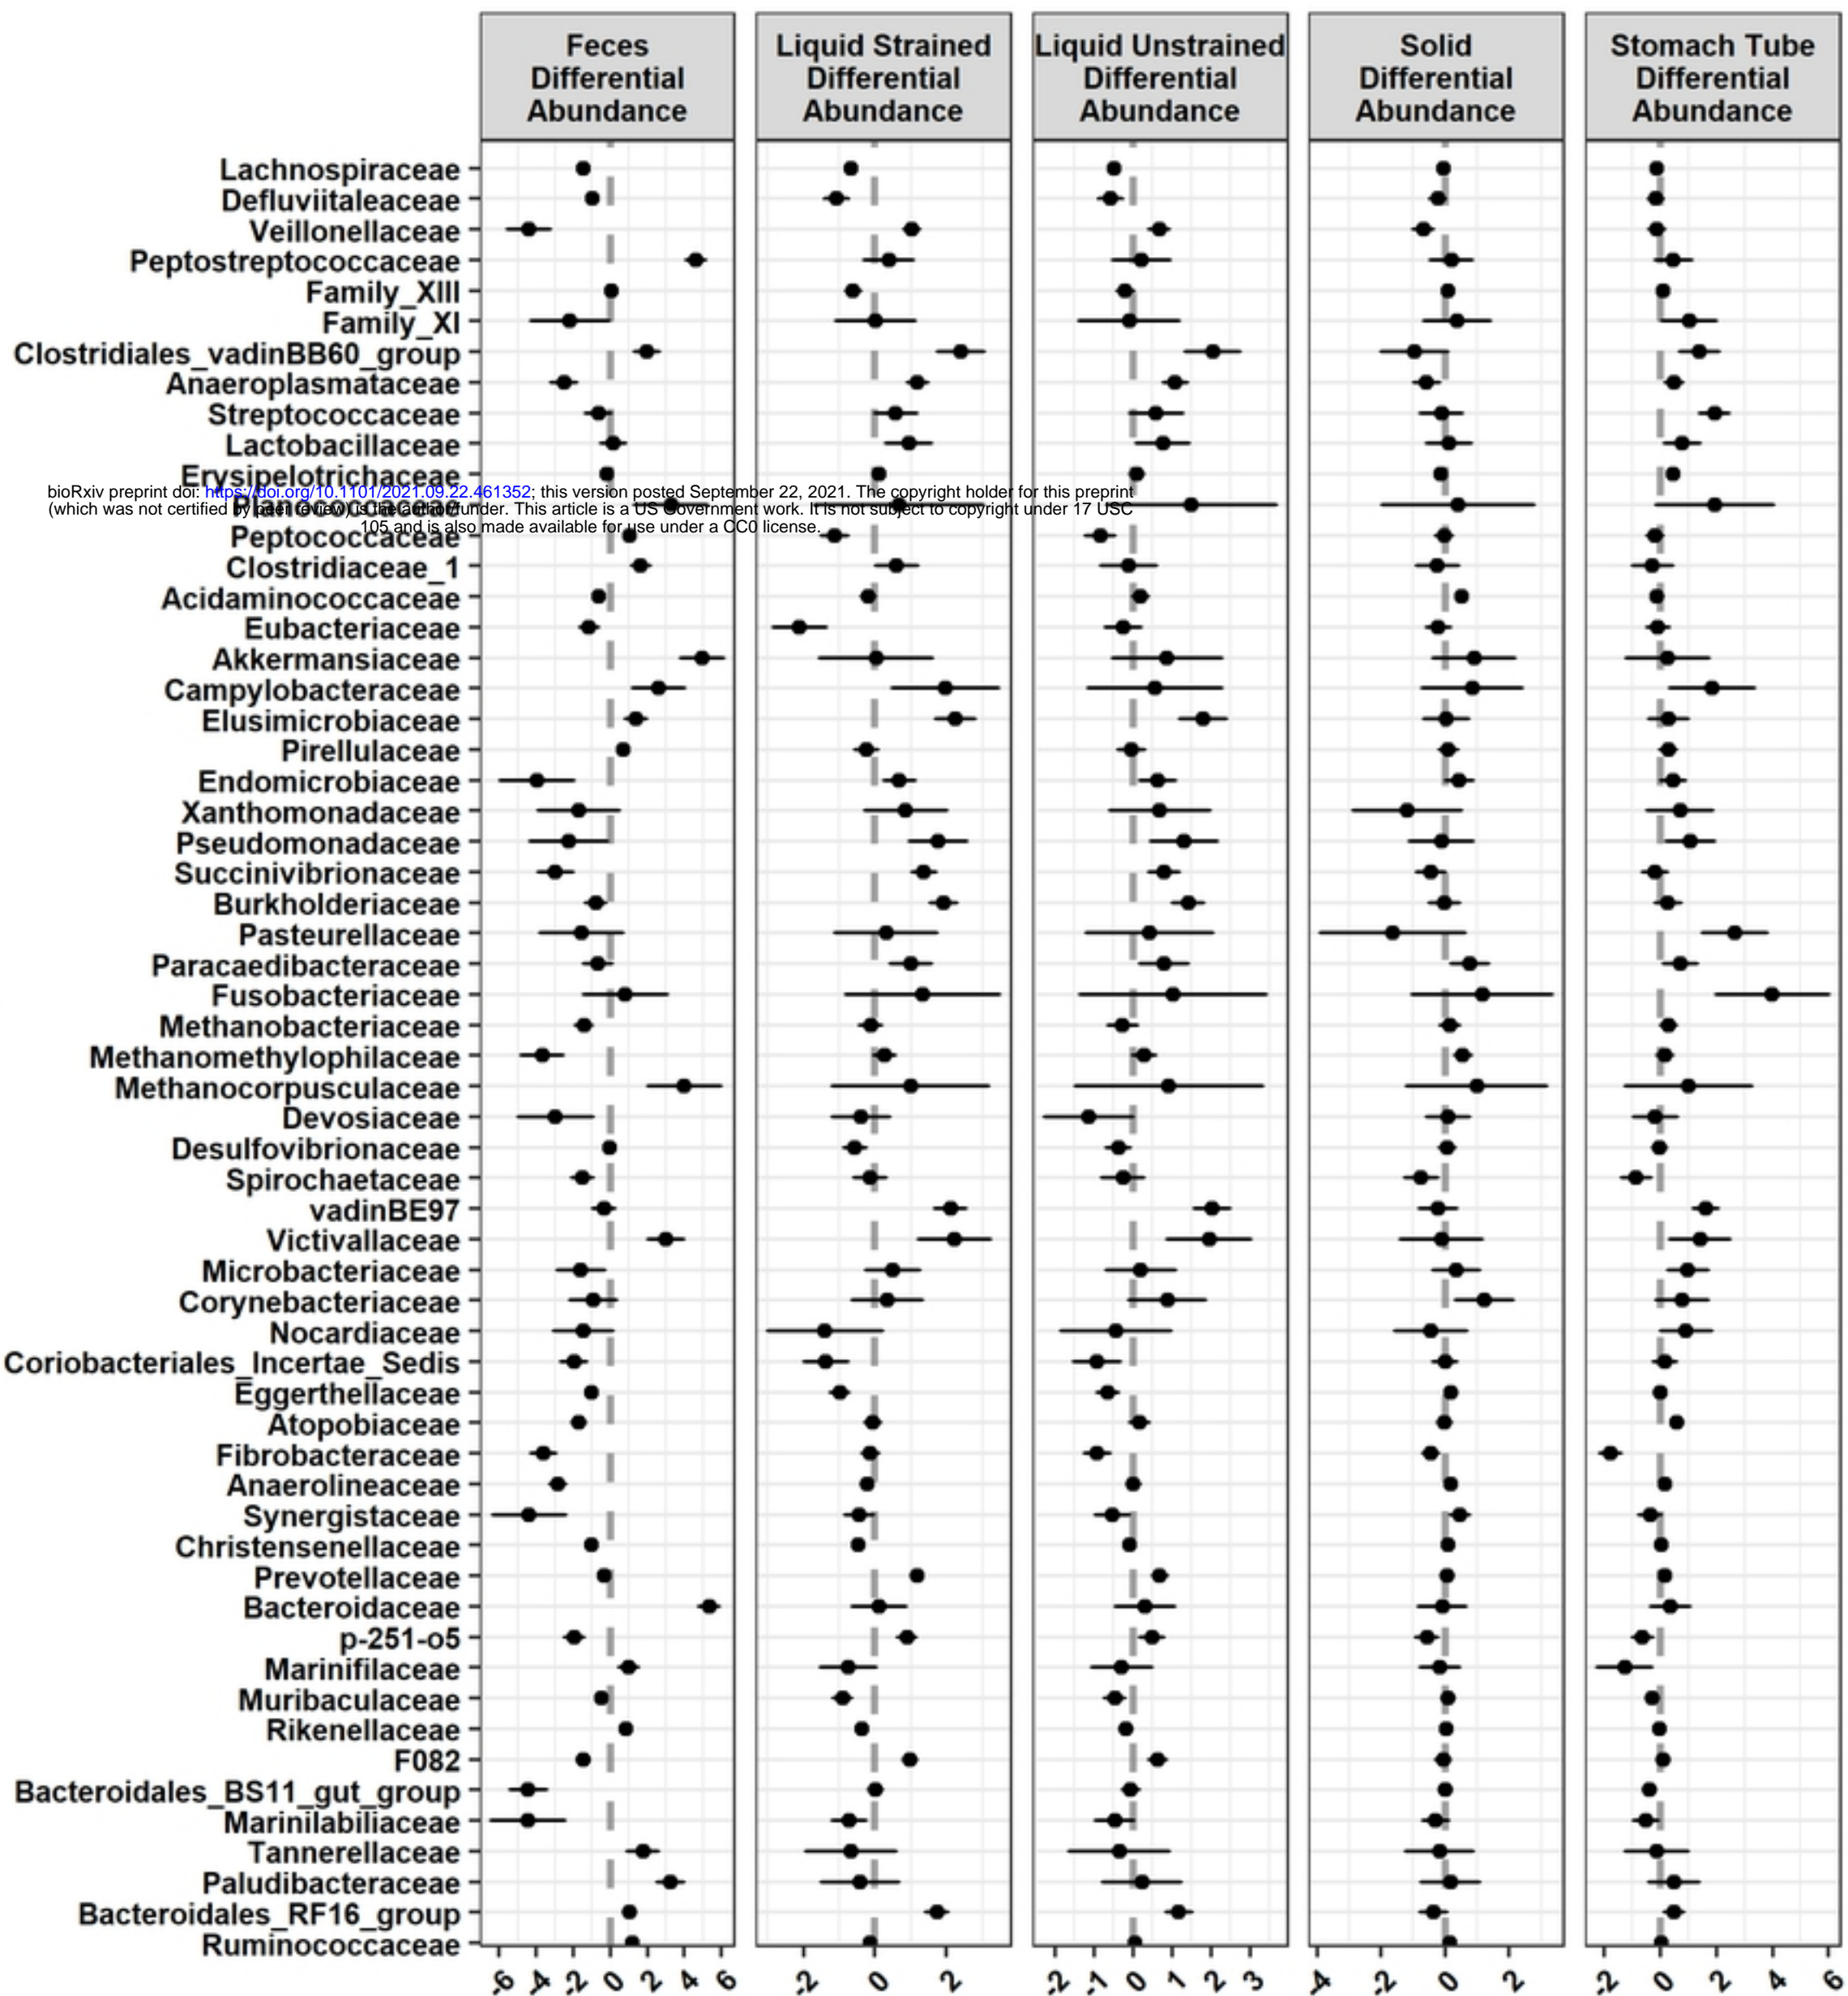

Fig 6
